# Supplementary material
Source: PubMed Central journal article supplement (PMC7513372)
Supplement: ao0c02413_si_006.pdf [file ao0c02413_si_006.pdf]

# Supporting information

## **Soft Heteroleptic N-Heterocyclic Carbene Palladium(II) Species For Efficient Catalytic Routes to Alkynones Via Carbonylative Sonogashira Coupling**

Waseem Mansour<sup>a</sup>, Rami Suleiman<sup>b</sup>, Mohammed Fettouhi<sup>a</sup>, Bassam El Ali<sup>a\*</sup>

*<sup>a</sup>Chemistry Department, King Fahd University of Petroleum & Minerals, Dhahran 31261, Saudi Arabia*

*<sup>b</sup>Center of Research Excellence in Corrosion, King Fahd University of Petroleum & Minerals, Dhahran 31261, Saudi Arabia.*

## Contents

- $^1\text{H}$  and  $^{13}\text{C}$  NMR for catalysis products S3-S23
- Molecular orbital energy diagram (DFT) table S1 S24
- Steric map of the complexes Figure S1 S24
- $^1\text{H}$  and  $^{13}\text{C}$  NMR spectra for pre ligands S25–S30
- $^1\text{H}$  and  $^{13}\text{C}$  NMR spectra for complexes S31–S33

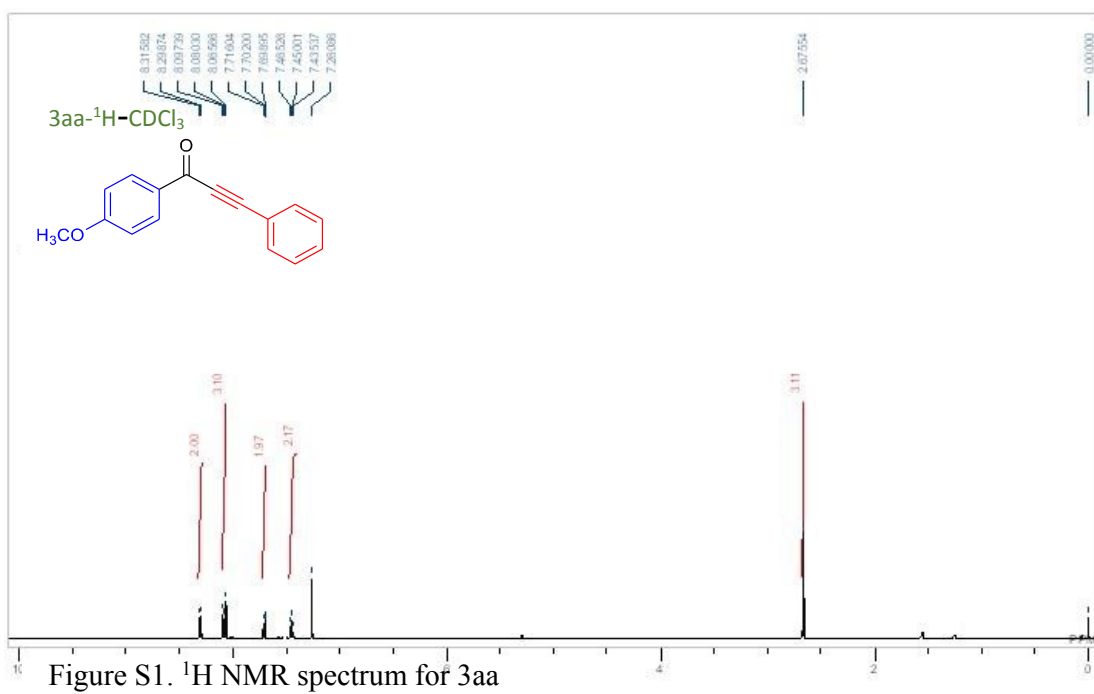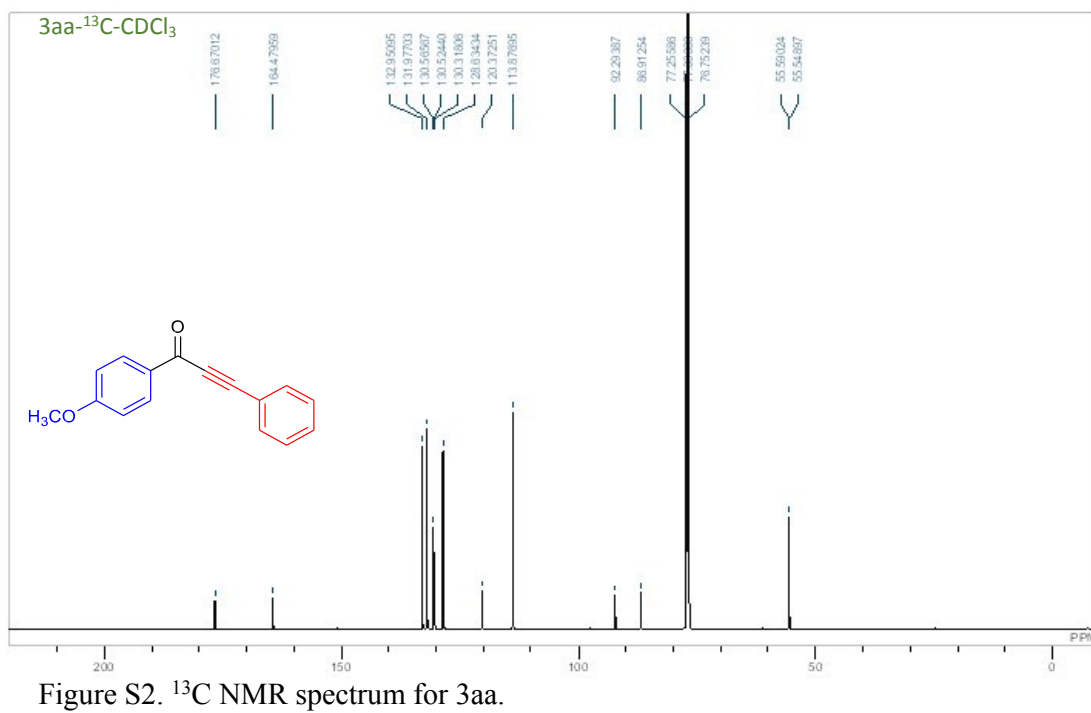

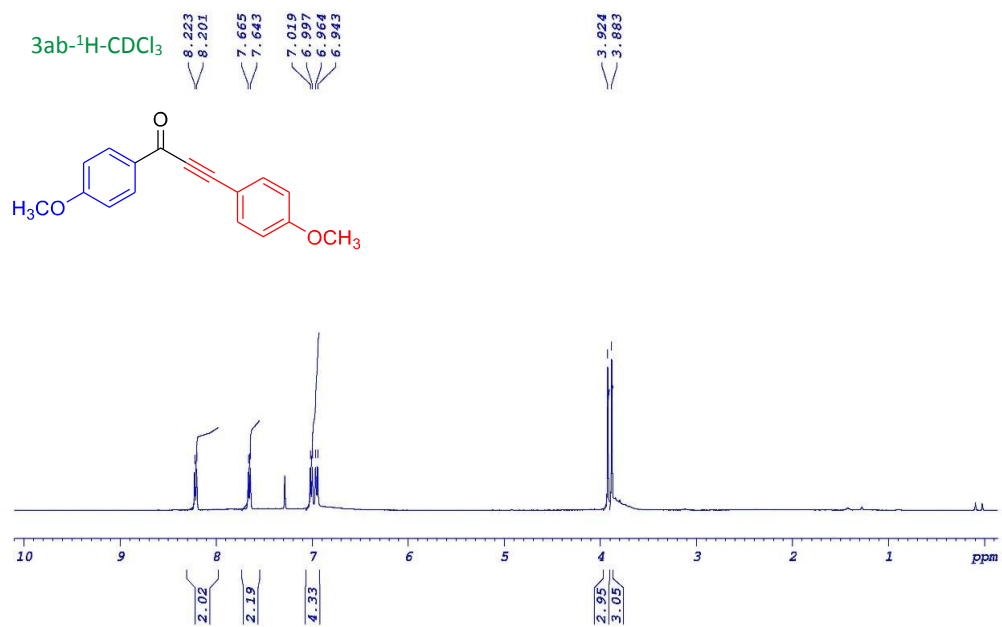

Figure S3. <sup>1</sup>H NMR spectrum for 3ab

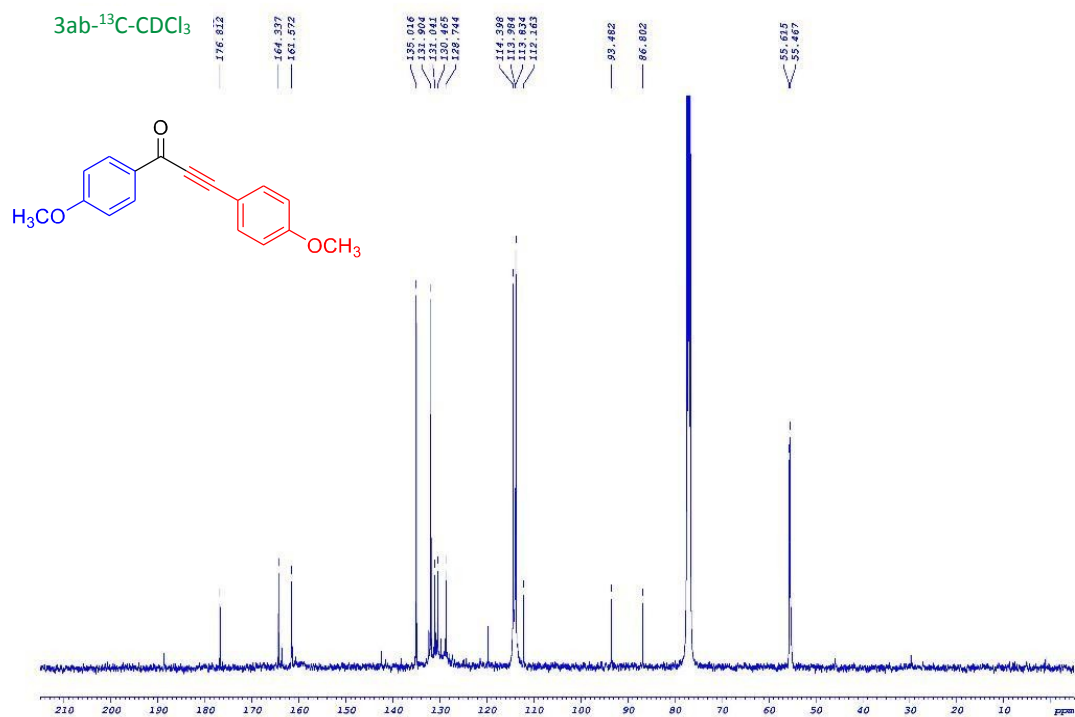

Figure S4. <sup>13</sup>C NMR spectrum for 3ab

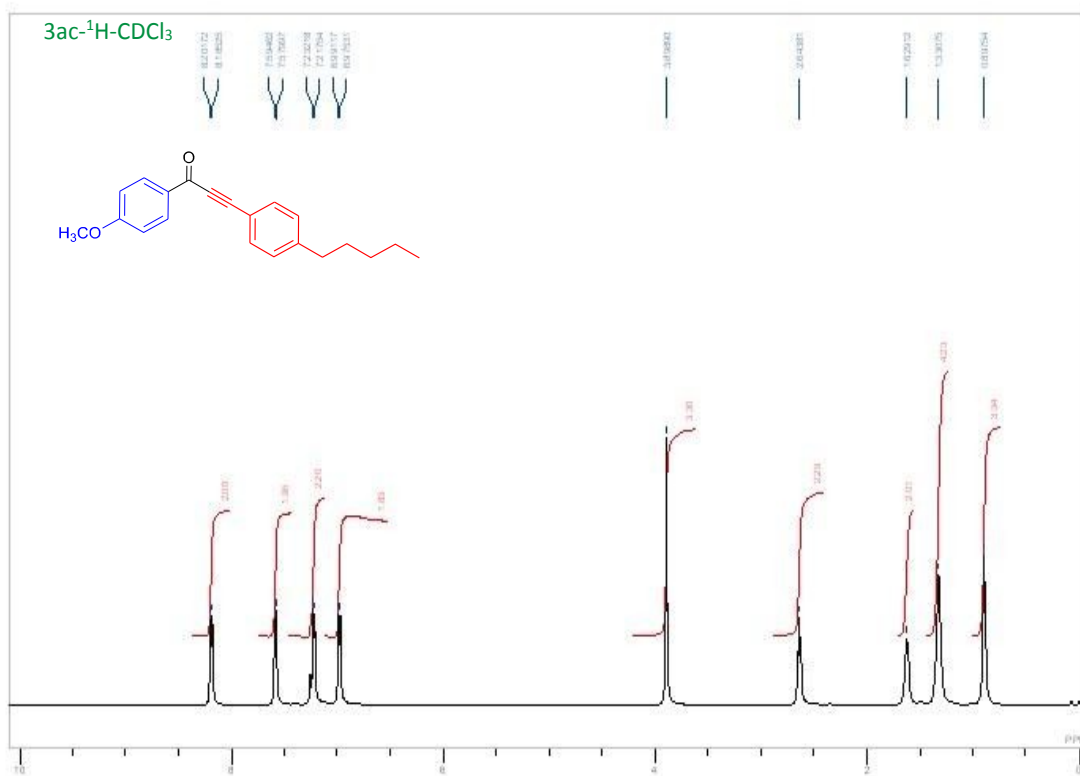

Figure S5. <sup>1</sup>H NMR spectrum for 3ac

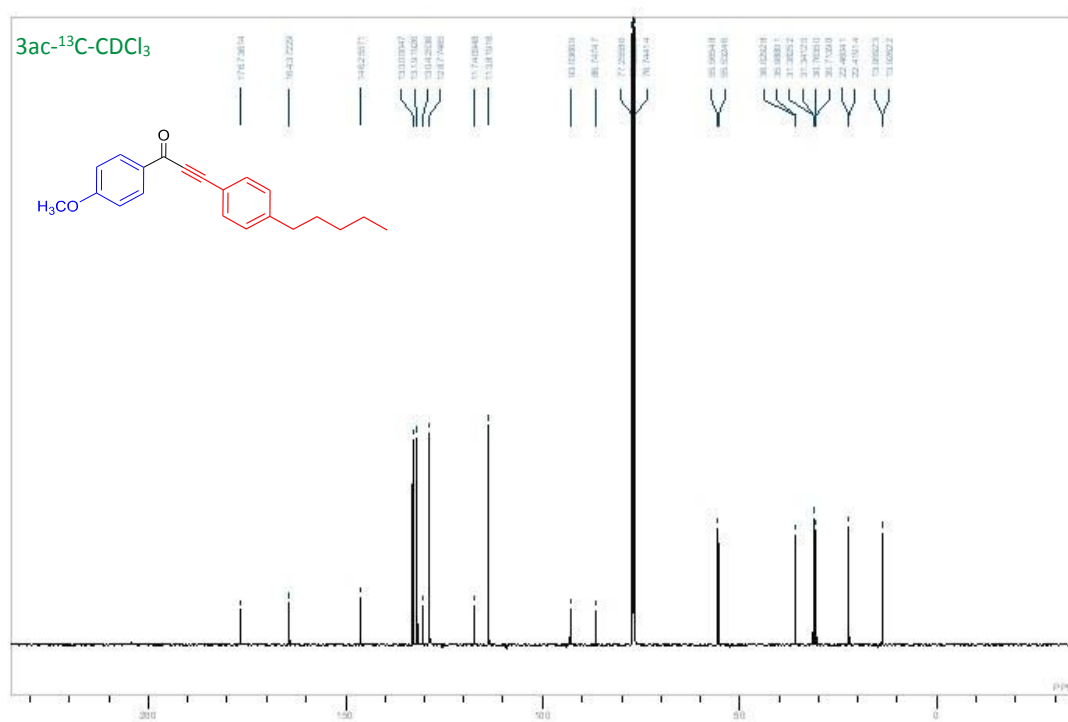

Figure S6. <sup>13</sup>C NMR spectrum for 3ac

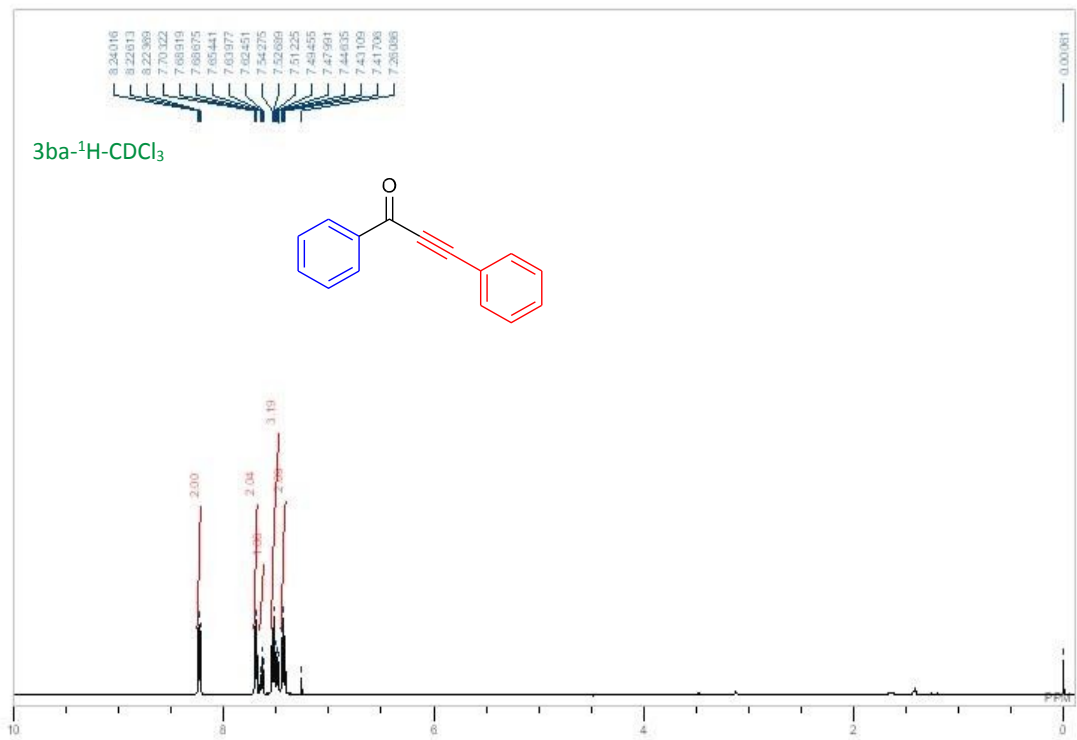

Figure S7. <sup>1</sup>H NMR spectrum for 3ba

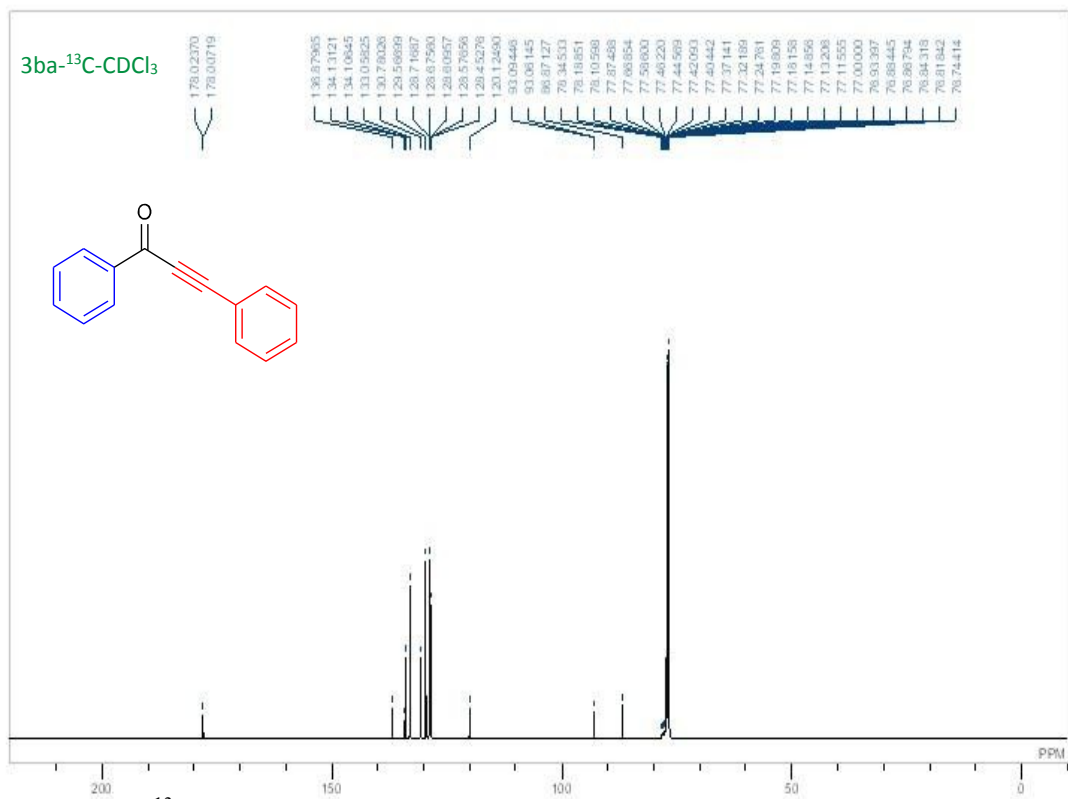

Figure S8. <sup>13</sup>C NMR spectrum for 3b

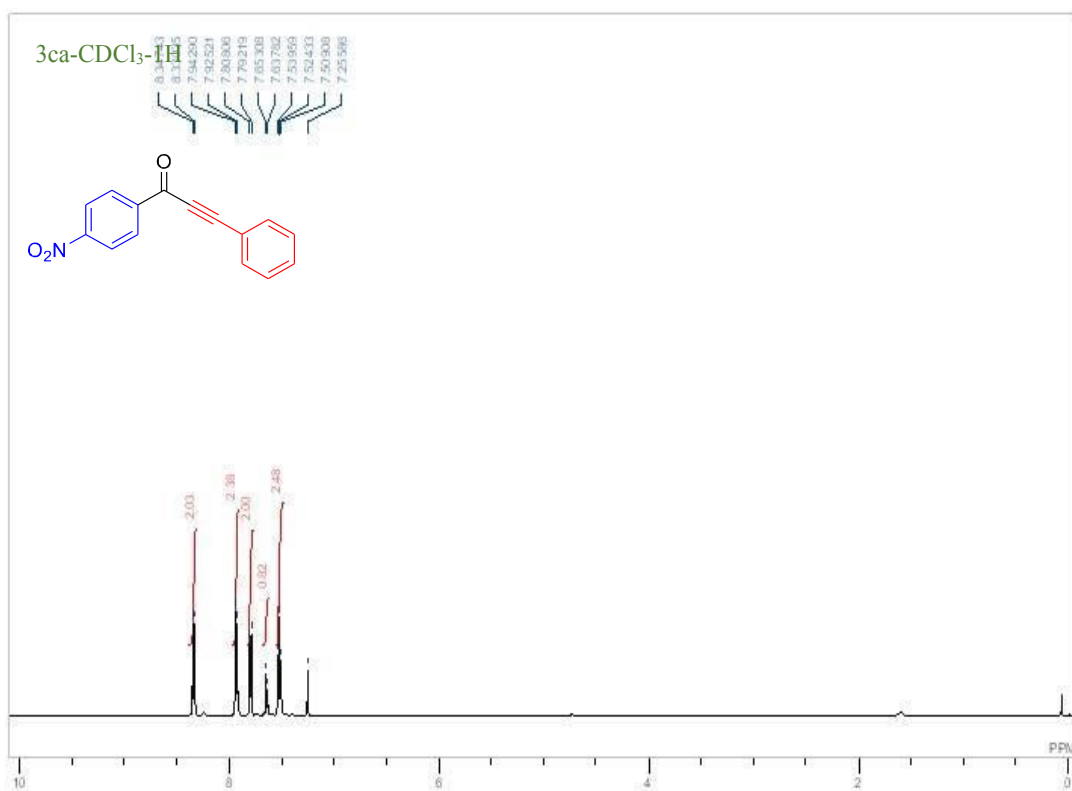

Figure S9. <sup>1</sup>H NMR spectrum for 3ca

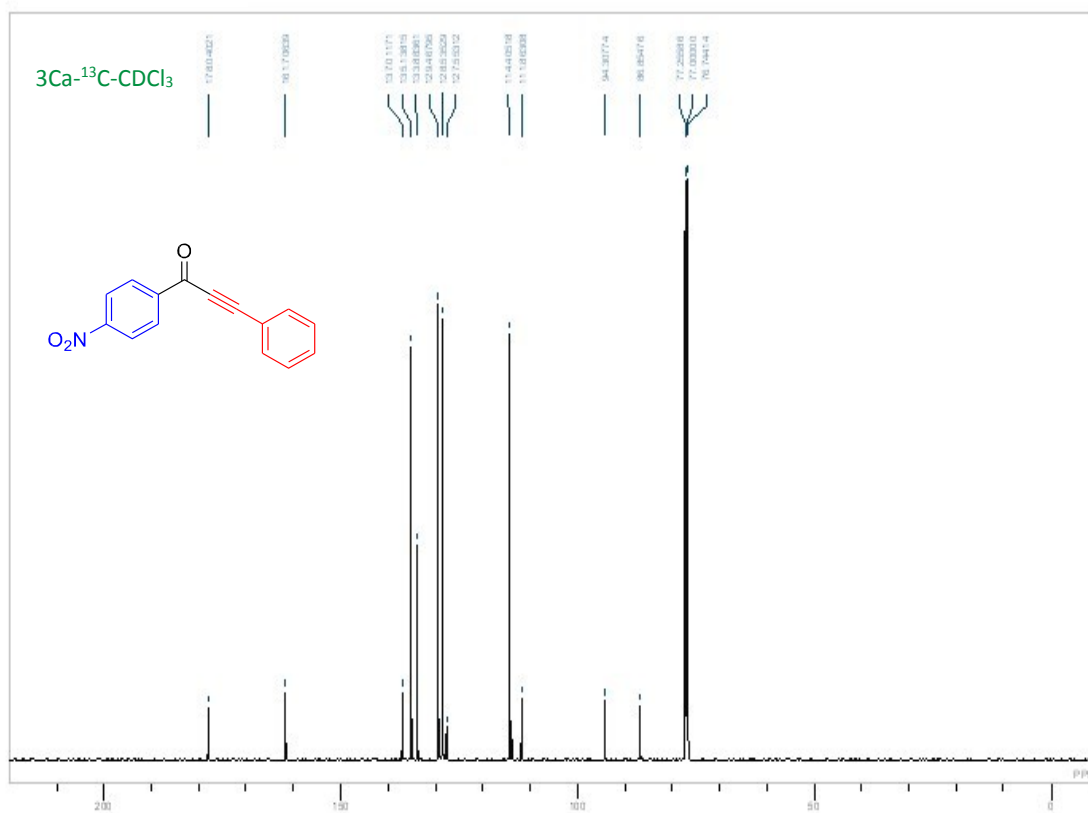

Figure S10. <sup>13</sup>C NMR spectrum for 3Ca

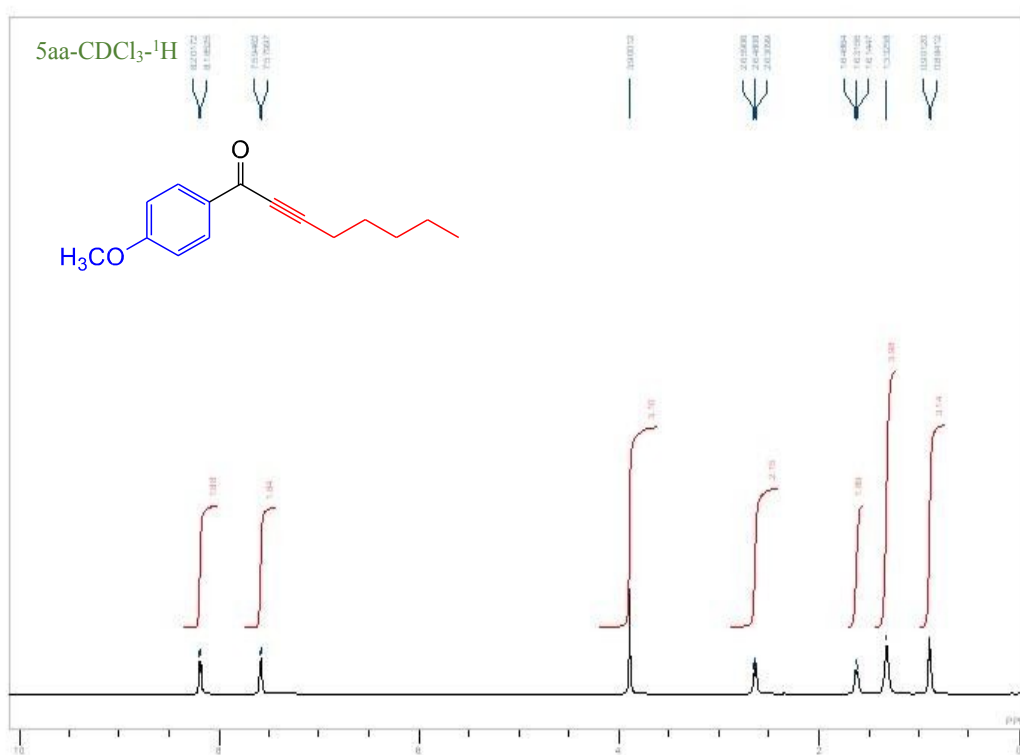

Figure S11. <sup>1</sup>H NMR spectrum for 5aa

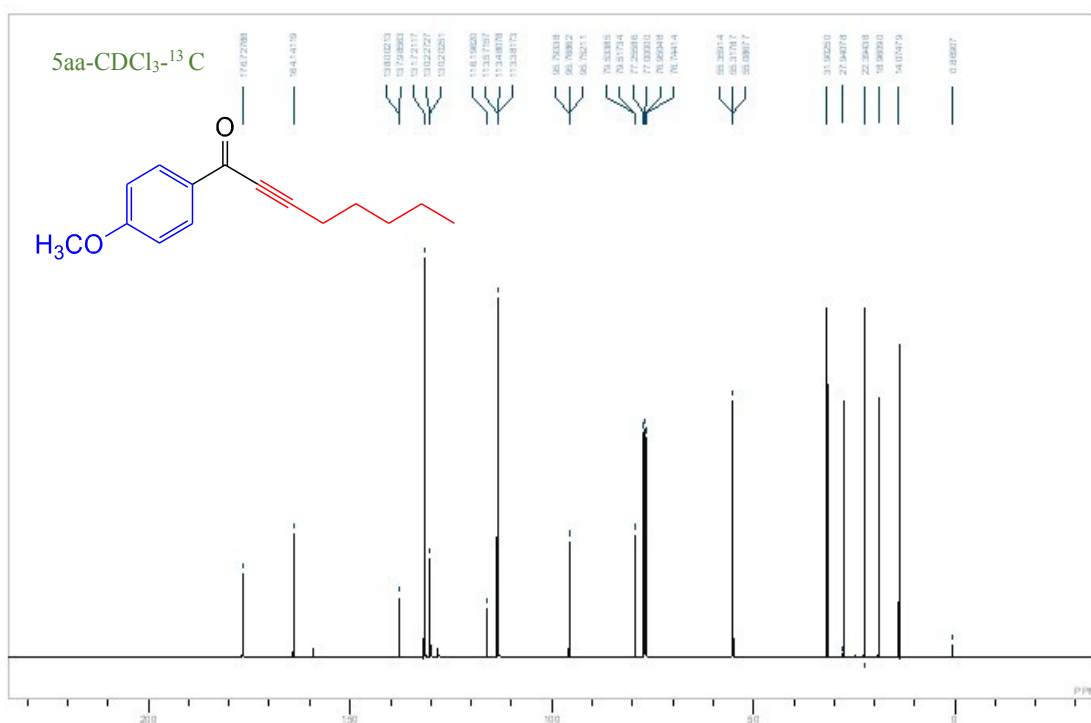

Figure S12. <sup>13</sup>C NMR spectrum for 5aa



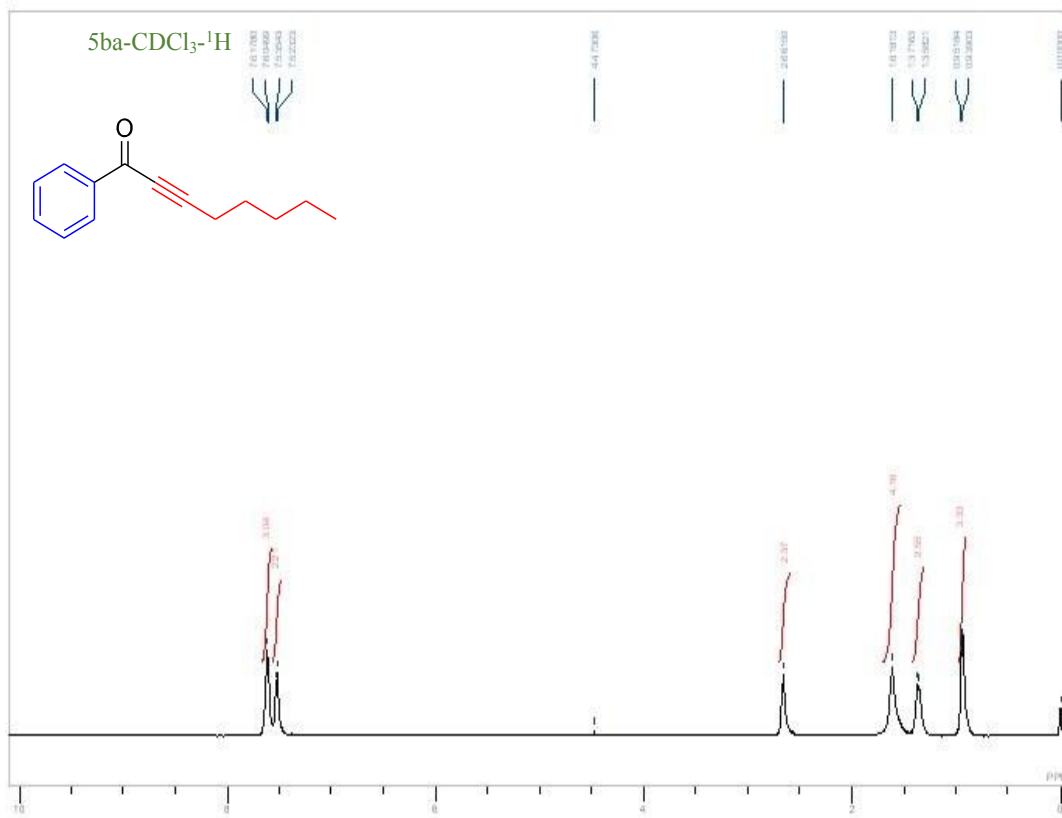

Figure S13. <sup>1</sup>H NMR spectrum for 5ba

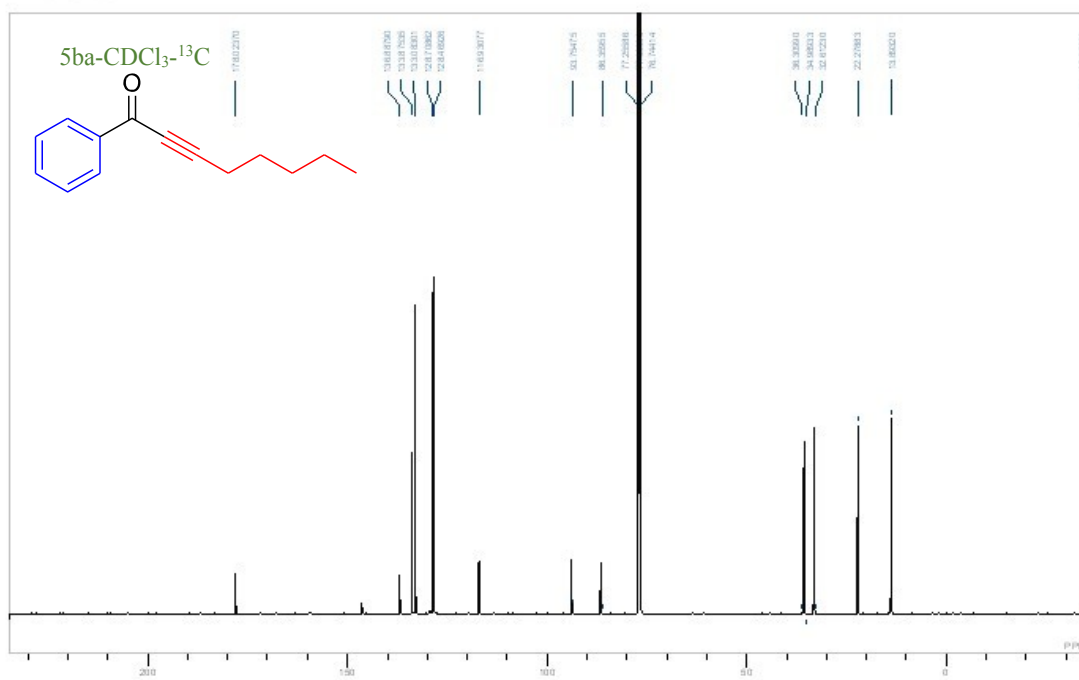

Figure S14. <sup>13</sup>C NMR spectrum for 5ba

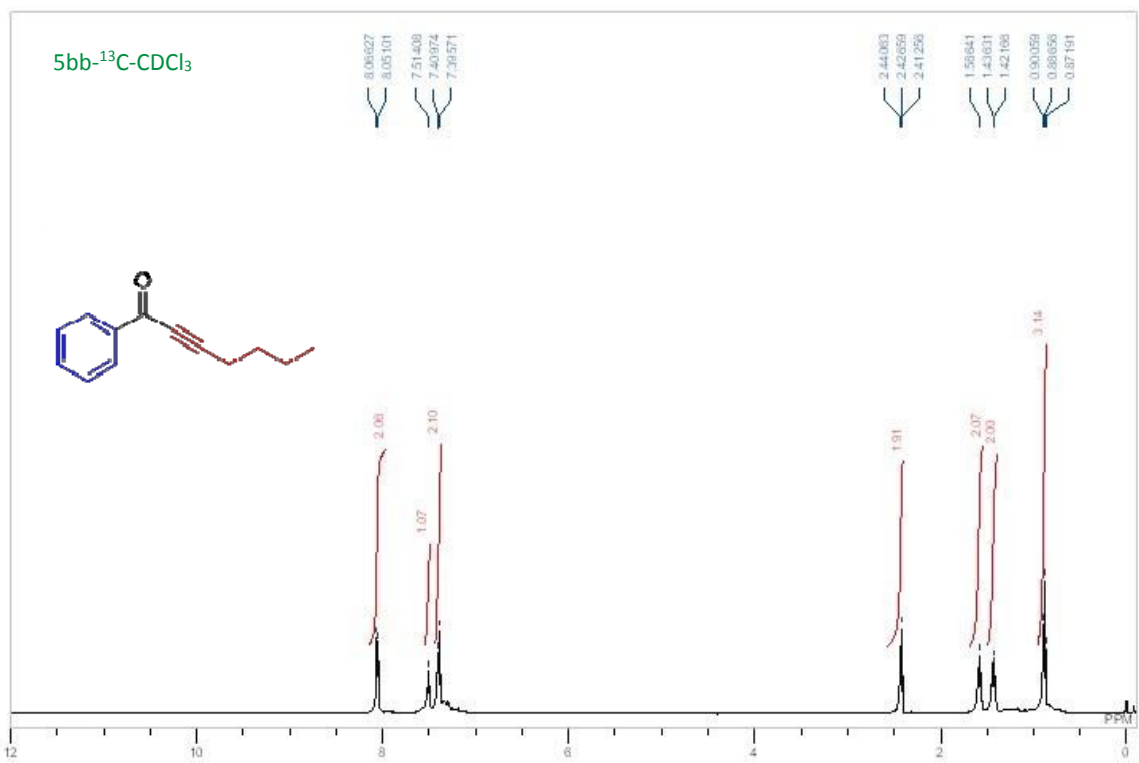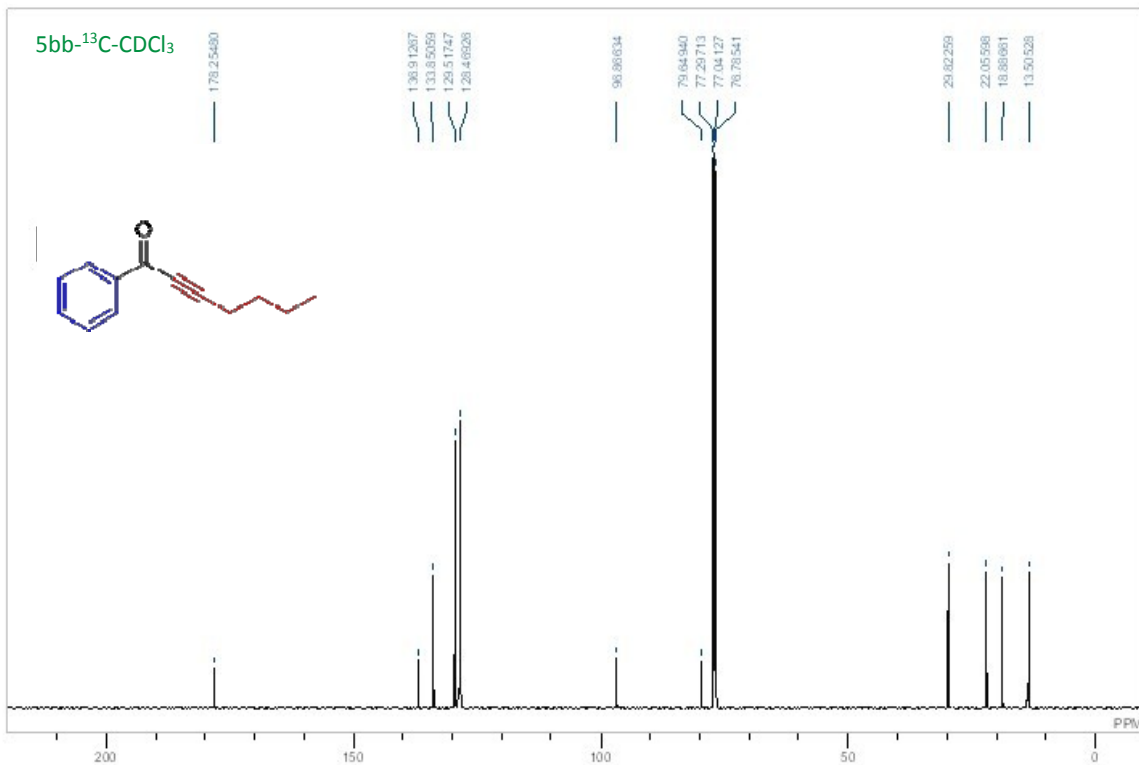

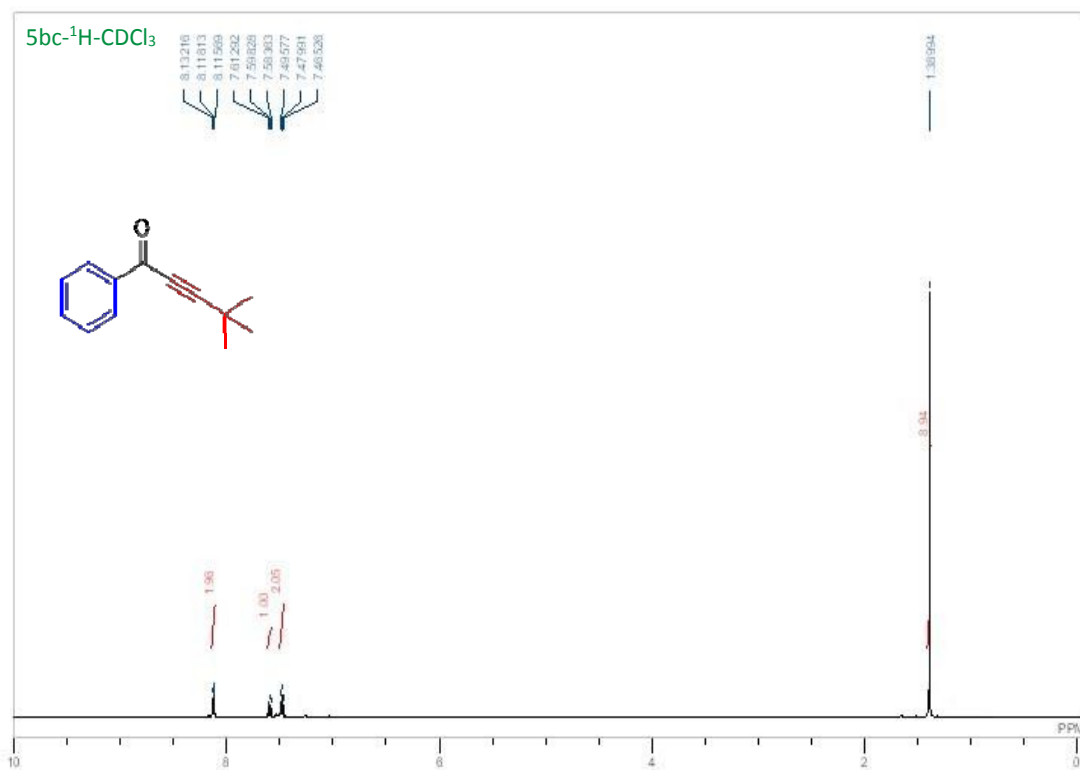

Figure S17. <sup>1</sup>H NMR spectrum for 5bc

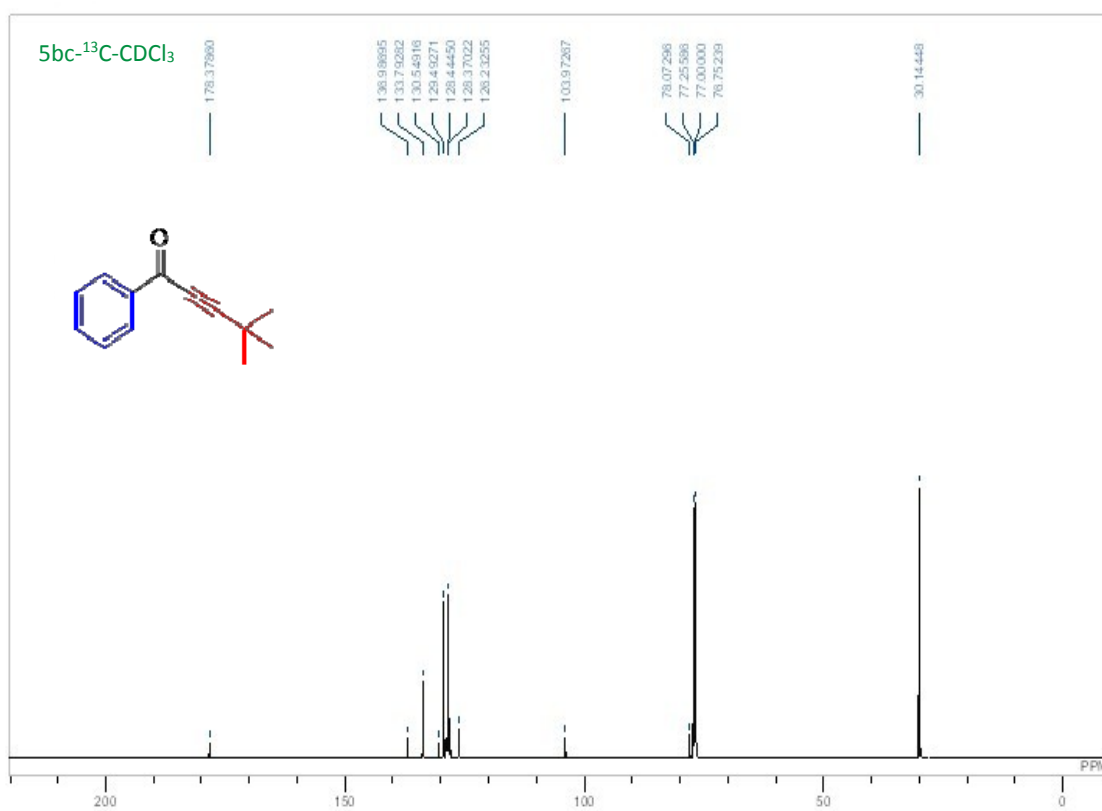

Figure S18. <sup>13</sup>C NMR spectrum for 5bc



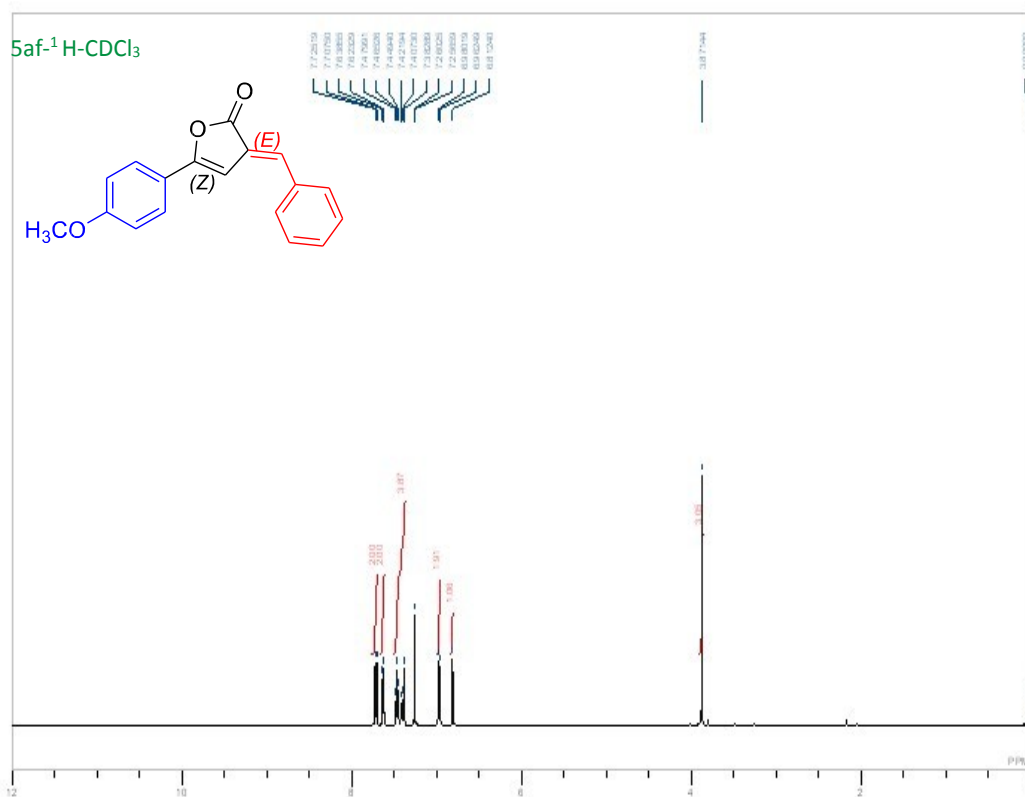

Figure S21. <sup>1</sup>H NMR spectrum for 5af

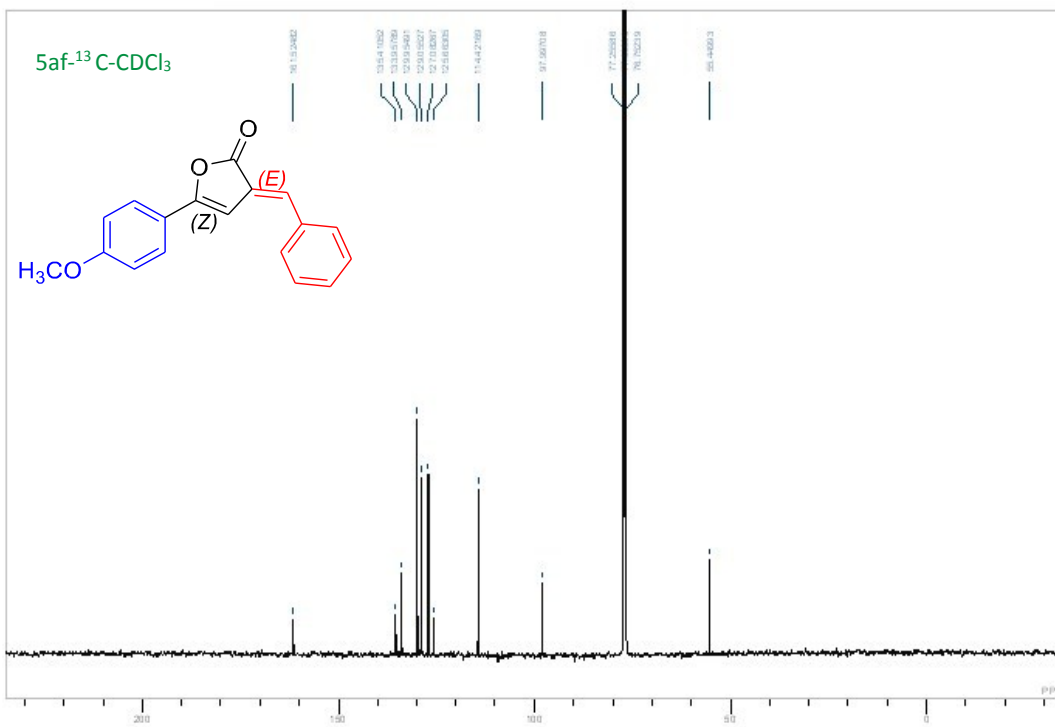

Figure S22. <sup>13</sup>C NMR spectrum for 5af

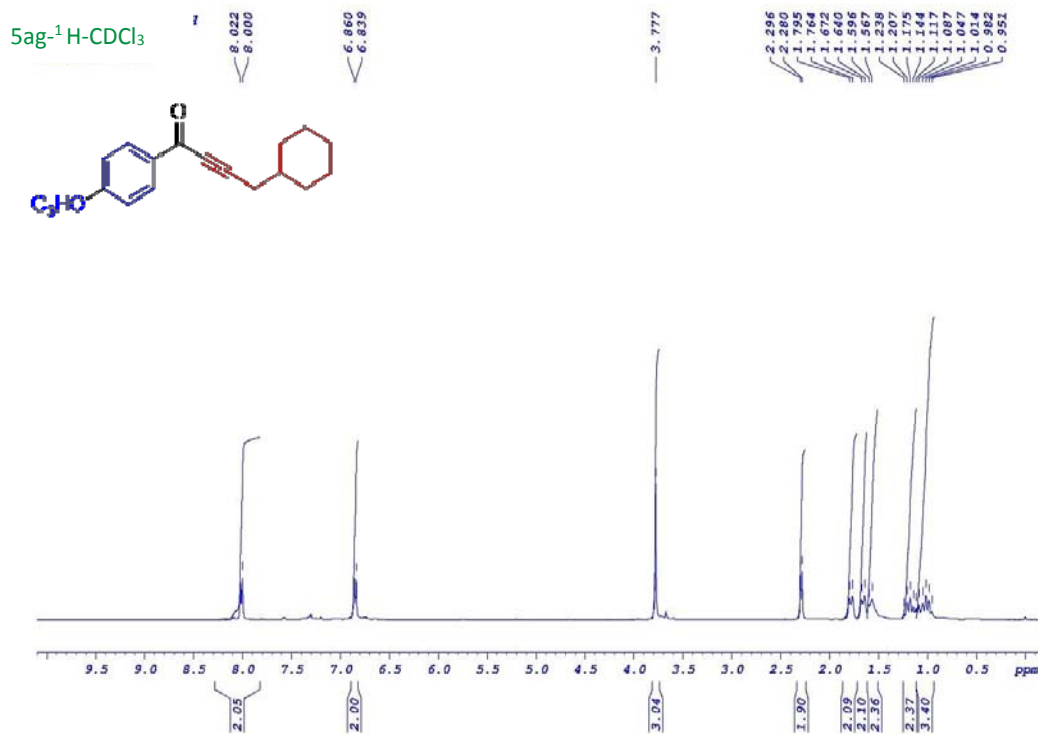

Figure S23. <sup>1</sup>H NMR spectrum for 5ag

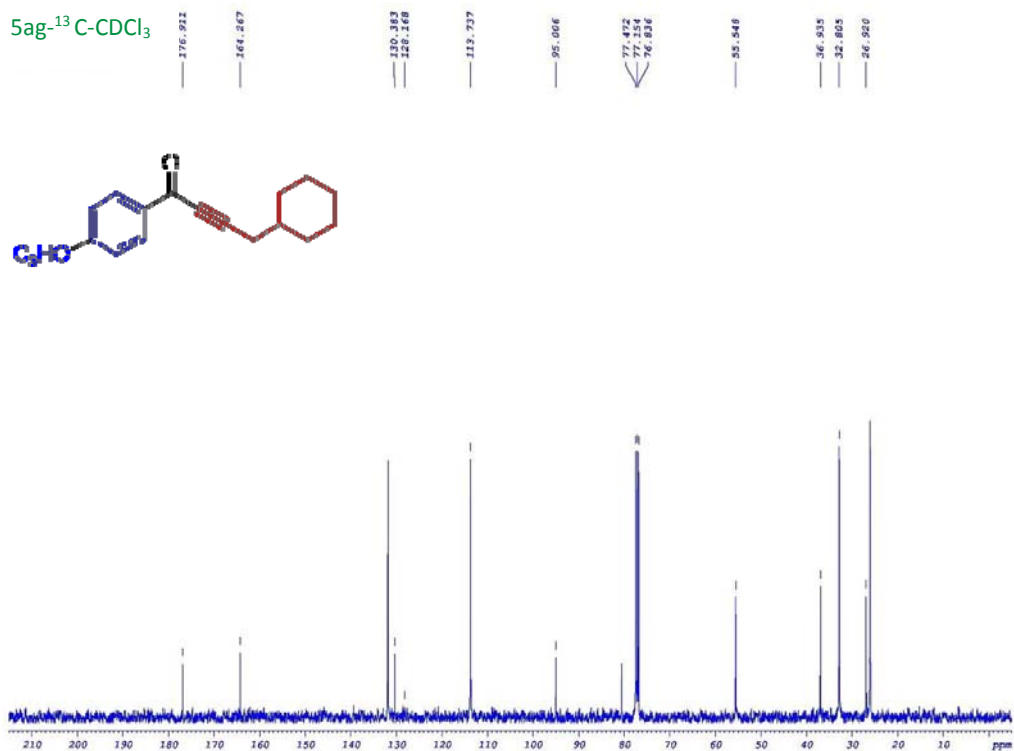

Figure S24. <sup>13</sup>C NMR spectrum for 5ag









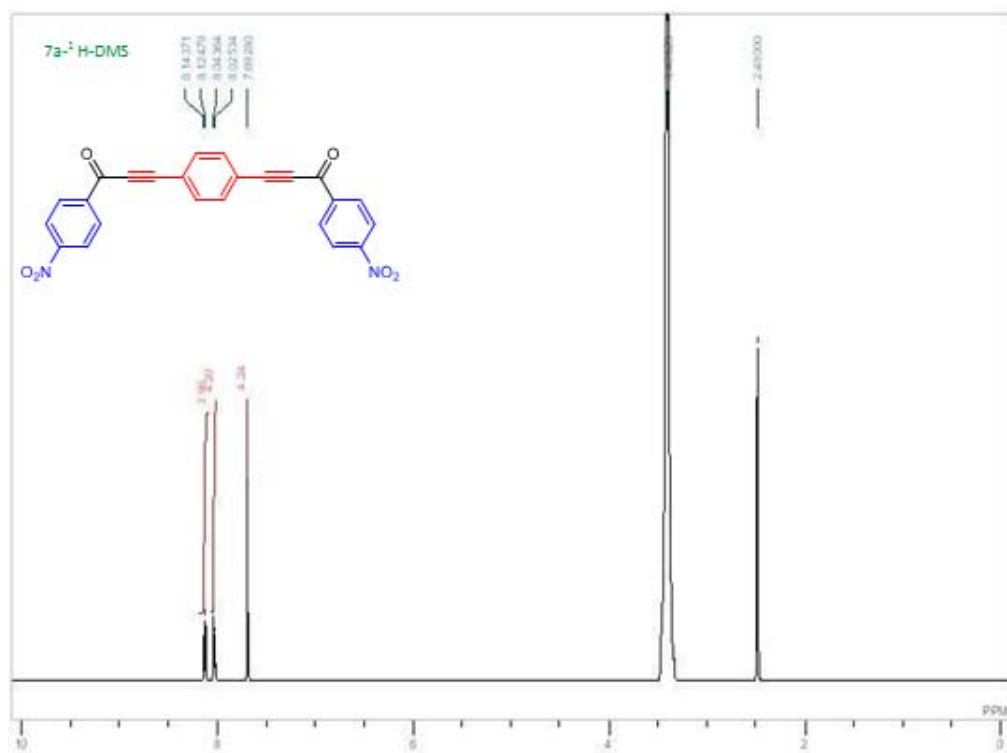

Figure S31. <sup>1</sup>H NMR spectrum for 7a

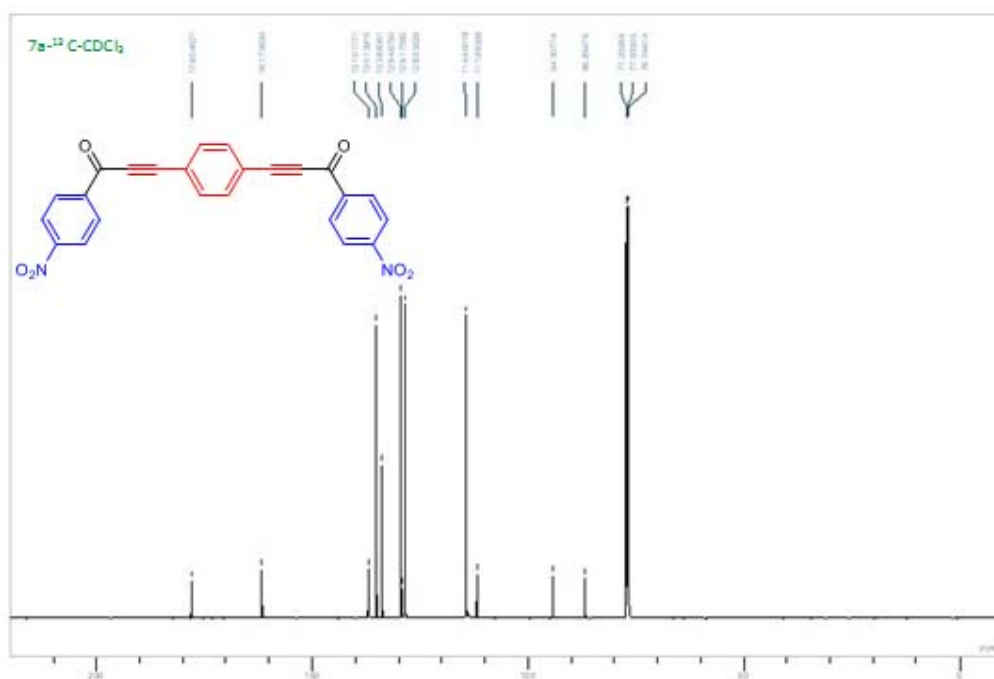

Figure S32. <sup>13</sup>C NMR spectrum for 7a

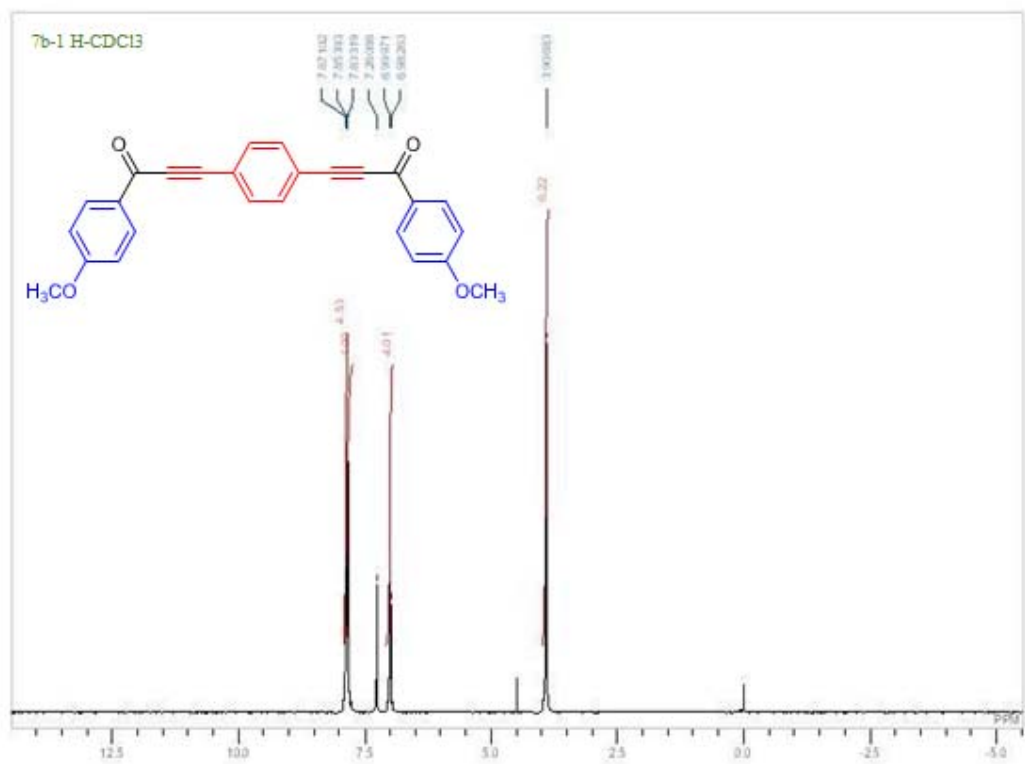

Figure S33. <sup>1</sup>H NMR spectrum for 7b

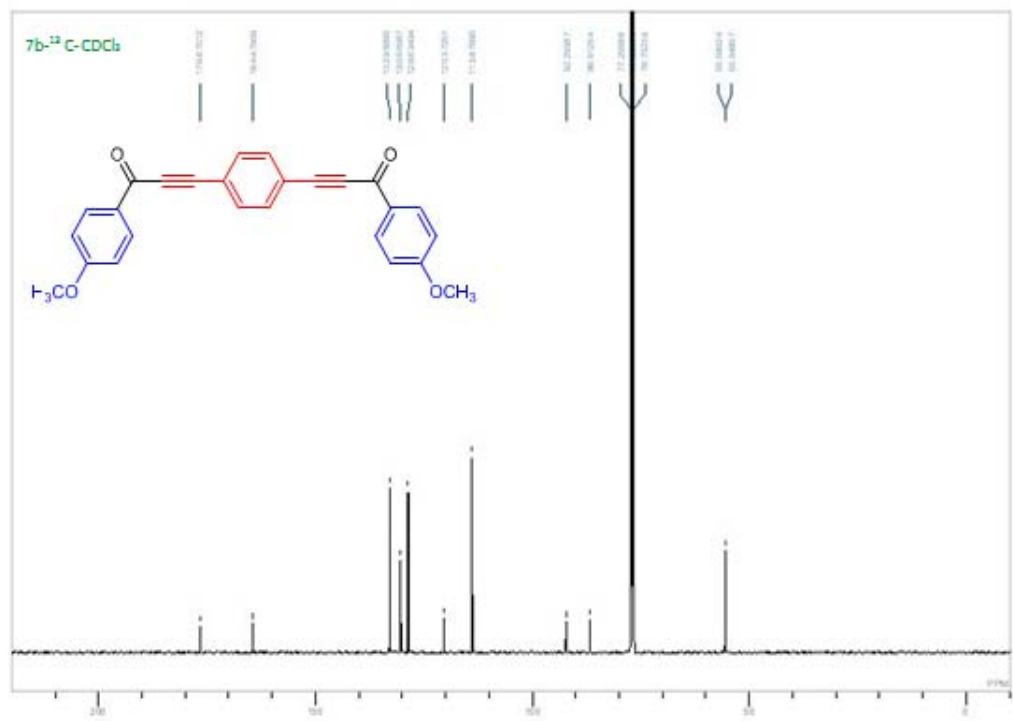

Figure S34. <sup>13</sup>C NMR spectrum for 7b

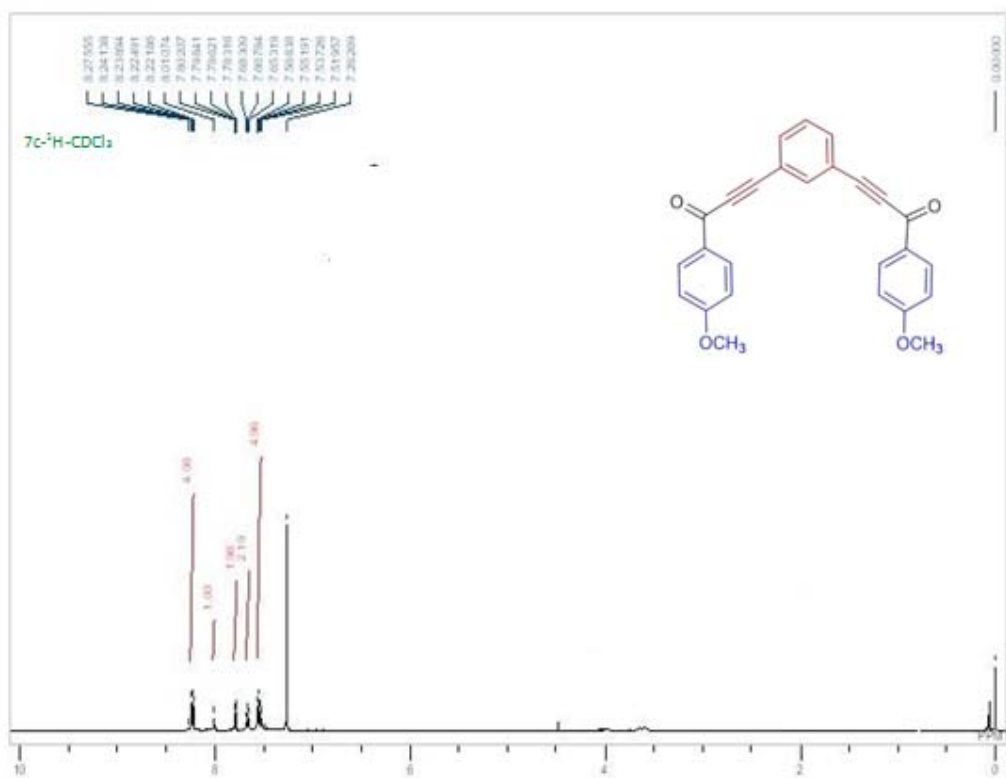

Figure S35. <sup>1</sup>H NMR spectrum for 7c

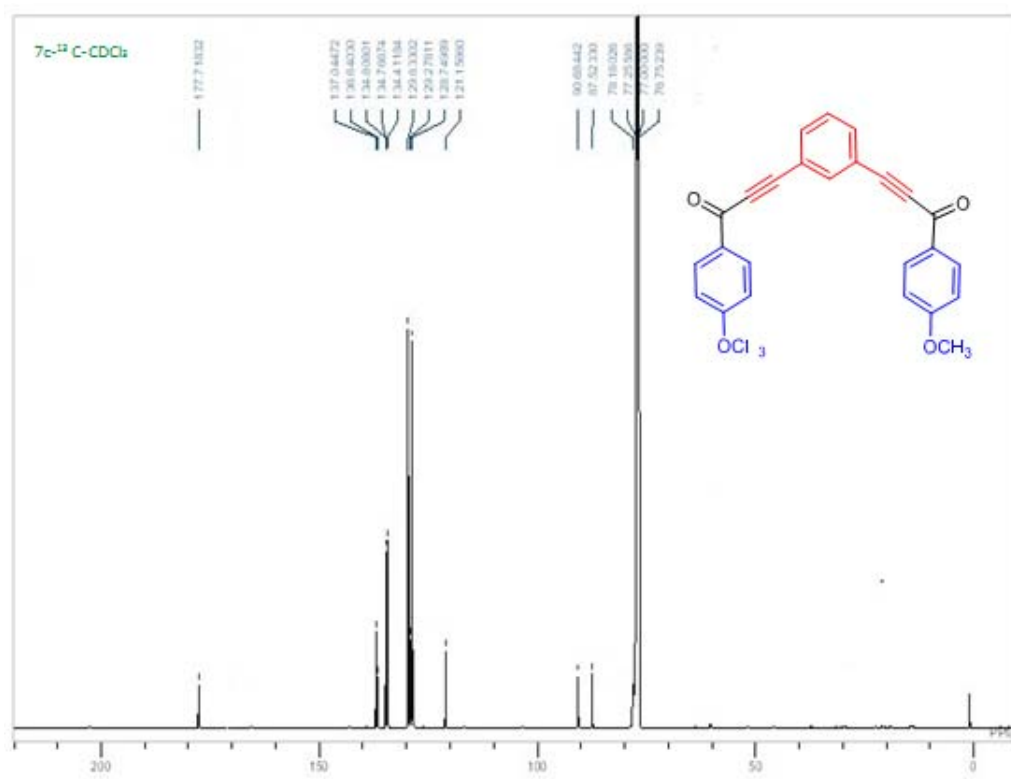

Figure S36. <sup>13</sup>C NMR spectrum for 7c





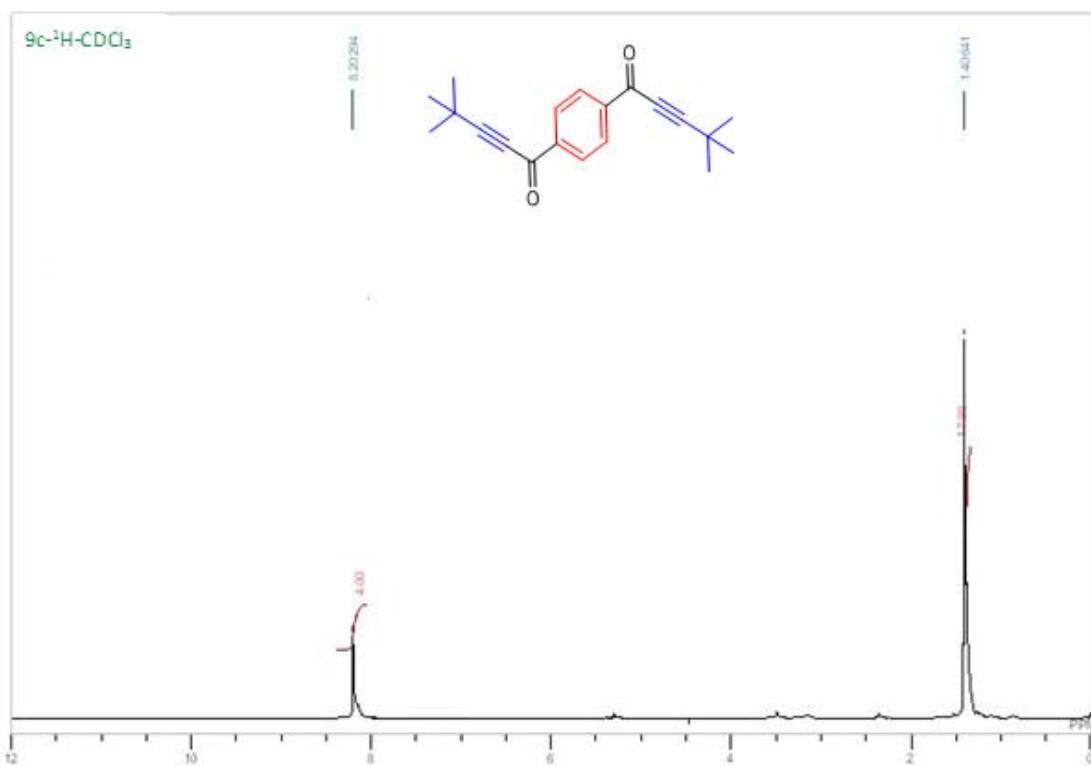

Figure S41. <sup>1</sup>H NMR spectrum for 9c

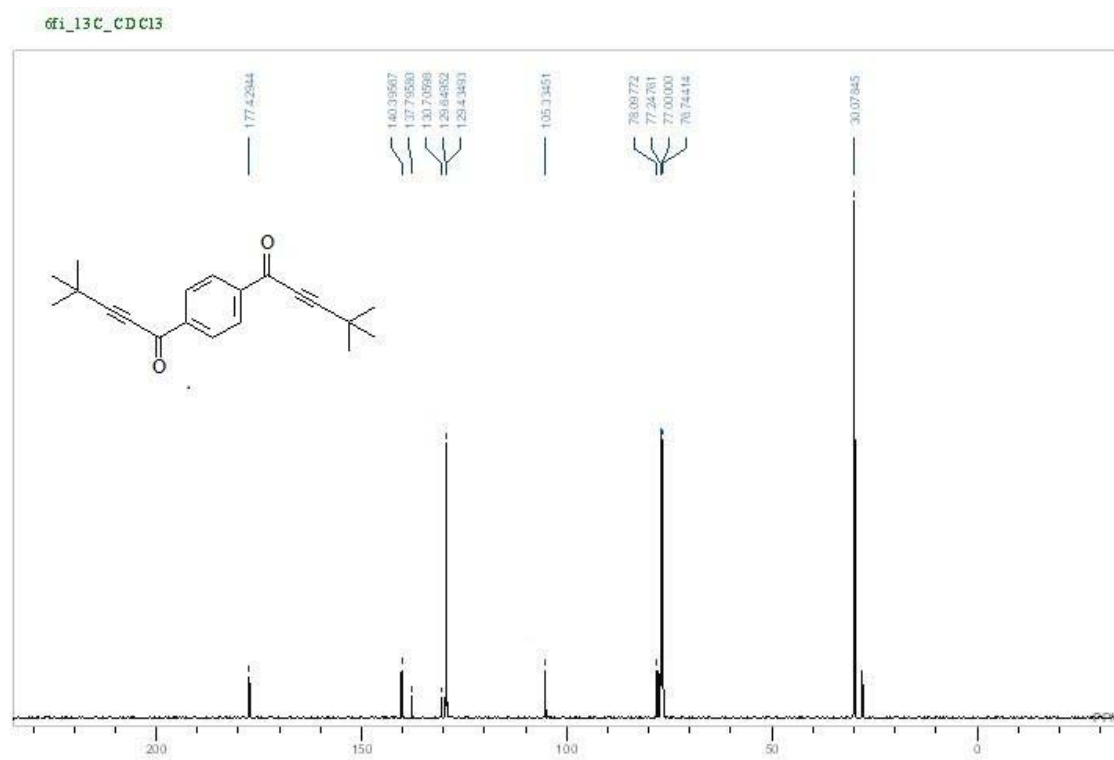

Figure S42. <sup>13</sup>C NMR spectrum for 9c

**Table S1.** Molecular orbital energy diagram for complexes **Pd-C1**, **Pd-C2**, and **Pd-C3** showing the HOMO, LUMO, the HOMO–LUMO gap ( $\Delta E$ ), electronegativity ( $\chi$ ), hardness ( $\eta$ ), and softness ( $S$ ).

| Complex Pd-C | $E_{\text{HOMO}}$ (eV) | $E_{\text{LUMO}}$ (eV) | $\Delta E$ (eV) | $\chi$ (eV)  | $\eta$ (eV)   | $S$ (eV)     |
|--------------|------------------------|------------------------|-----------------|--------------|---------------|--------------|
| <b>1</b>     | <b>-0.218</b>          | <b>-0.0634</b>         | <b>-0.155</b>   | <b>0.141</b> | <b>0.0773</b> | <b>6.468</b> |
| <b>2</b>     | <b>-0.219</b>          | <b>-0.0651</b>         | <b>-0.154</b>   | <b>0.142</b> | <b>0.0770</b> | <b>6.493</b> |
| <b>3</b>     | <b>-0.218</b>          | <b>-0.0653</b>         | <b>-0.153</b>   | <b>0.142</b> | <b>0.0764</b> | <b>6.544</b> |

- **Steric Map of Pd-NHCs-Py complexes: a) Pd-C1, b) Pd-C2 and c) Pd-C3**

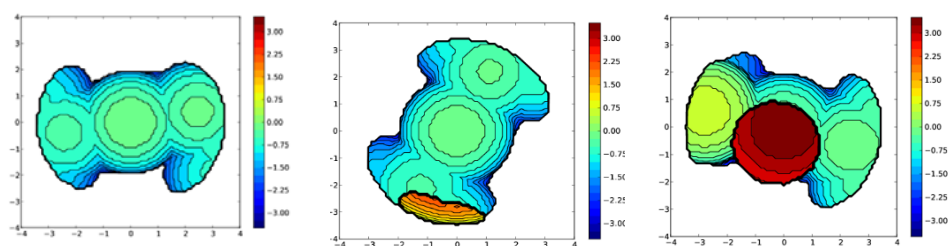

a) Pd-C1 N-iPr (28.5%)      b) Pd-C2 N-Benzyl (29.8%)      c) Pd-C3 N-Adamantyl (34.1%)

Figure S43. Steric Map of Pd-NHCs-Py complexes: a) Pd-C1, b) Pd-C2 and c) Pd-C



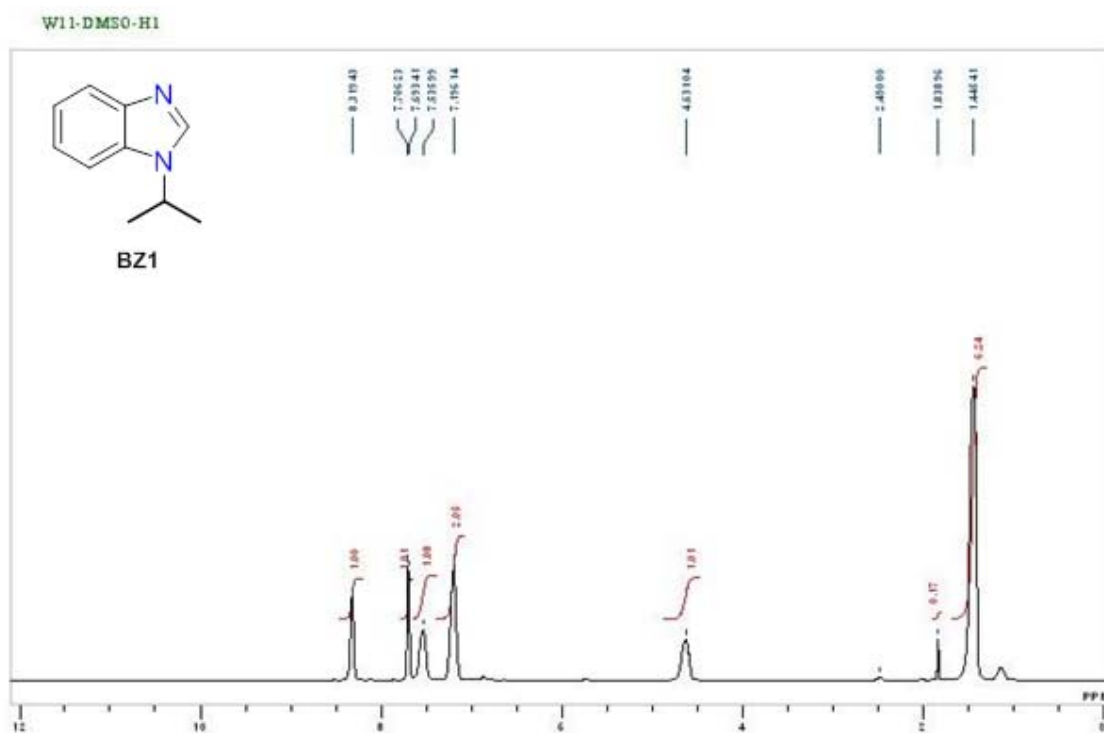

Figure S44. <sup>1</sup>H NMR spectrum for BZ1

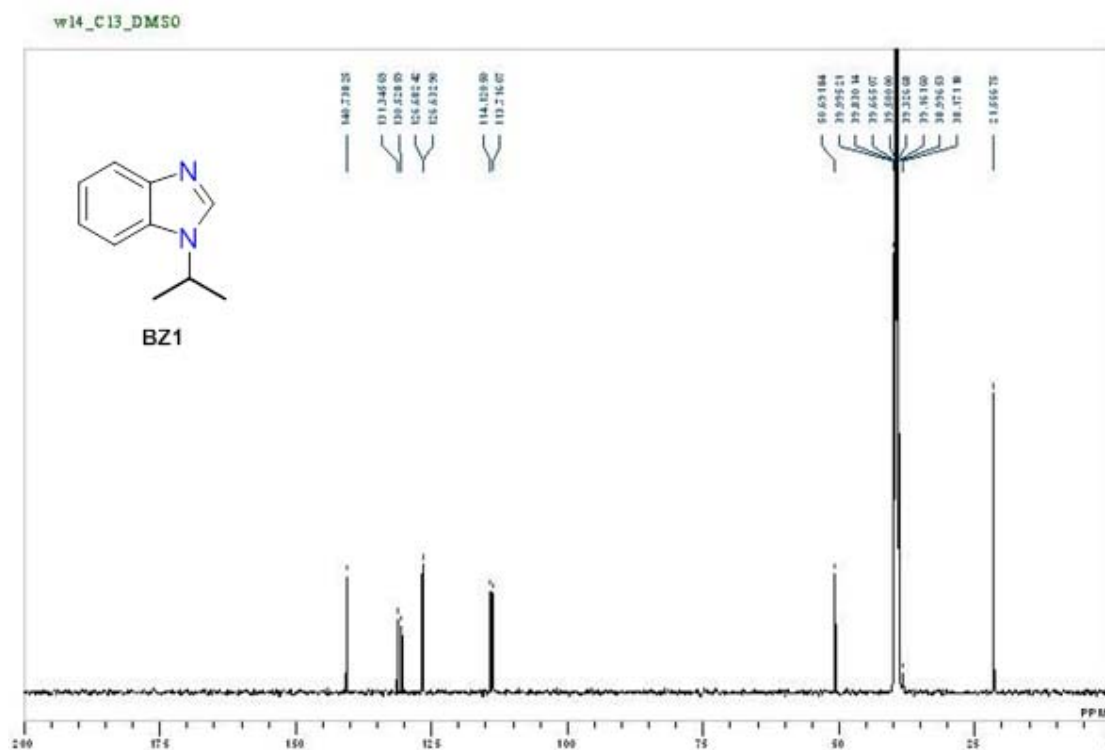

Figure S45. <sup>13</sup>C NMR spectrum for BZ1

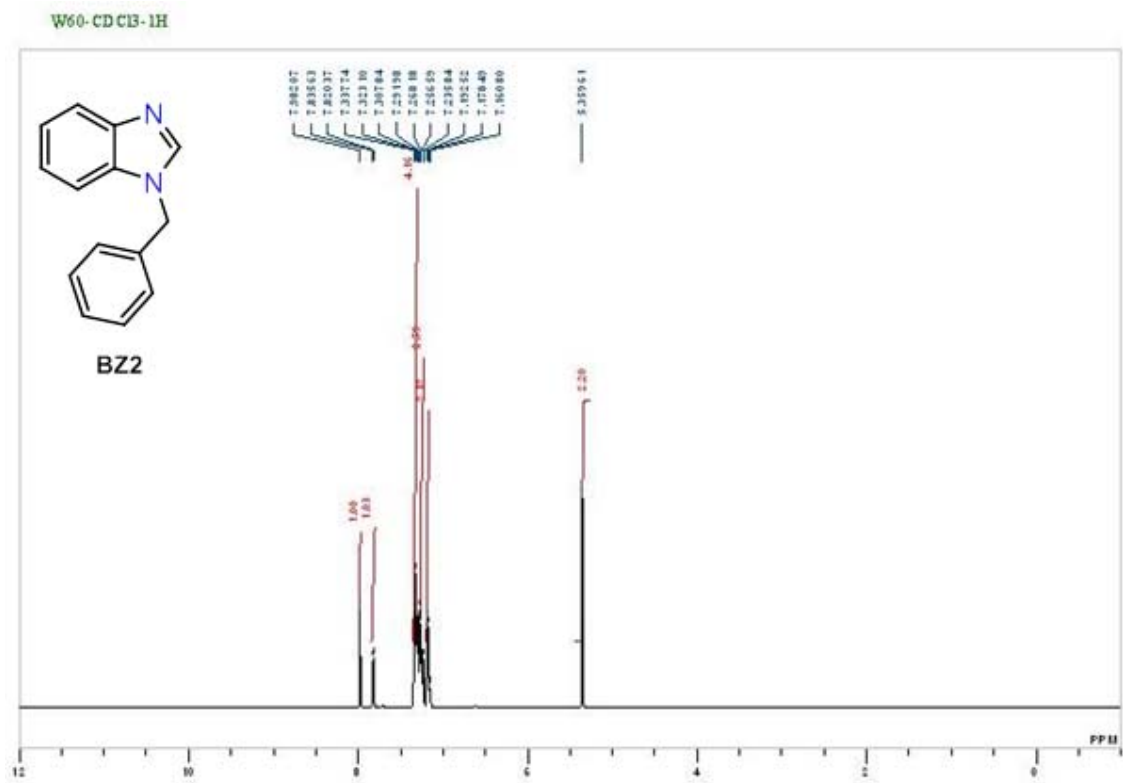

Figure S46. <sup>1</sup>H NMR spectrum for BZ2

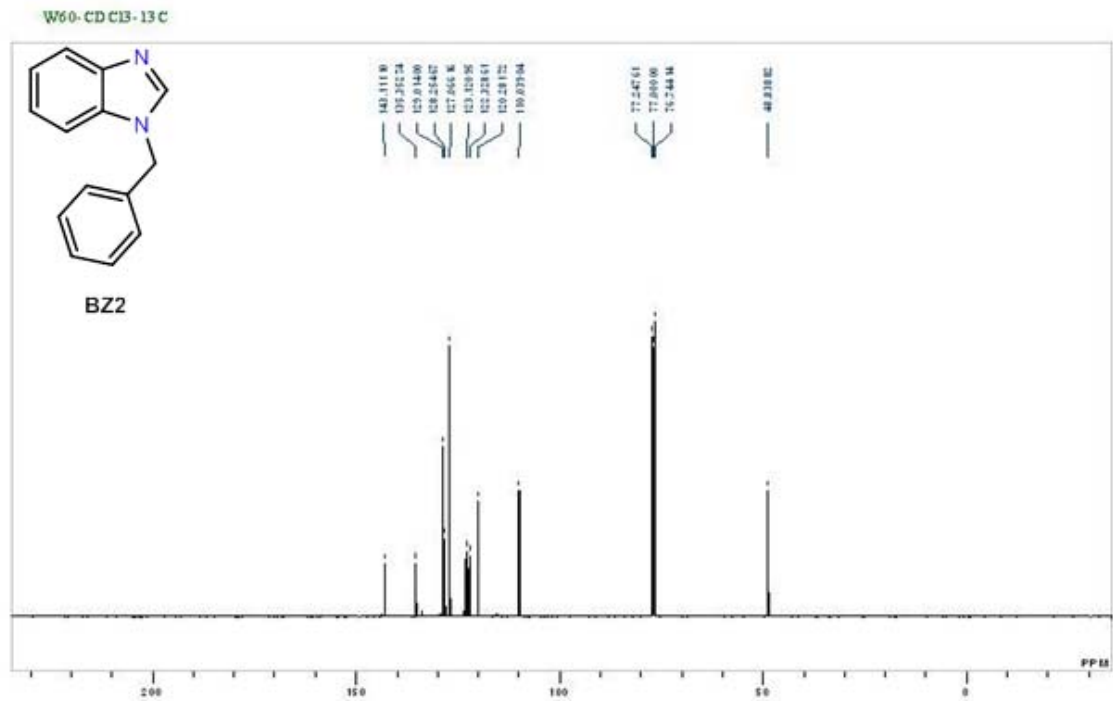

Figure S47. <sup>13</sup>C NMR spectrum for BZ2

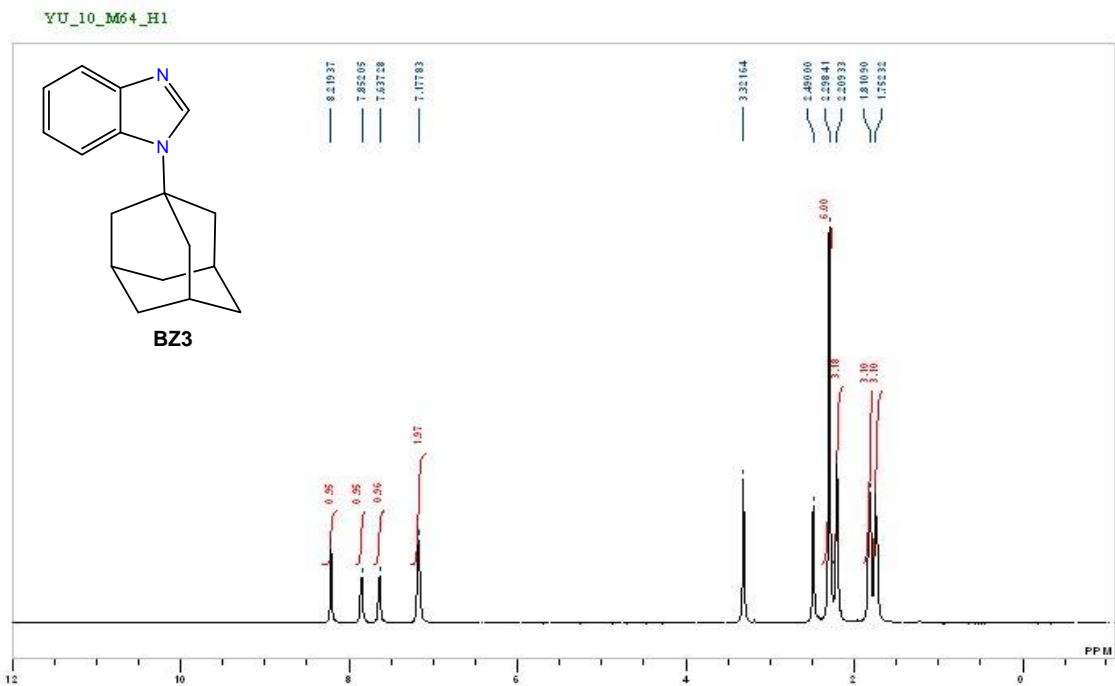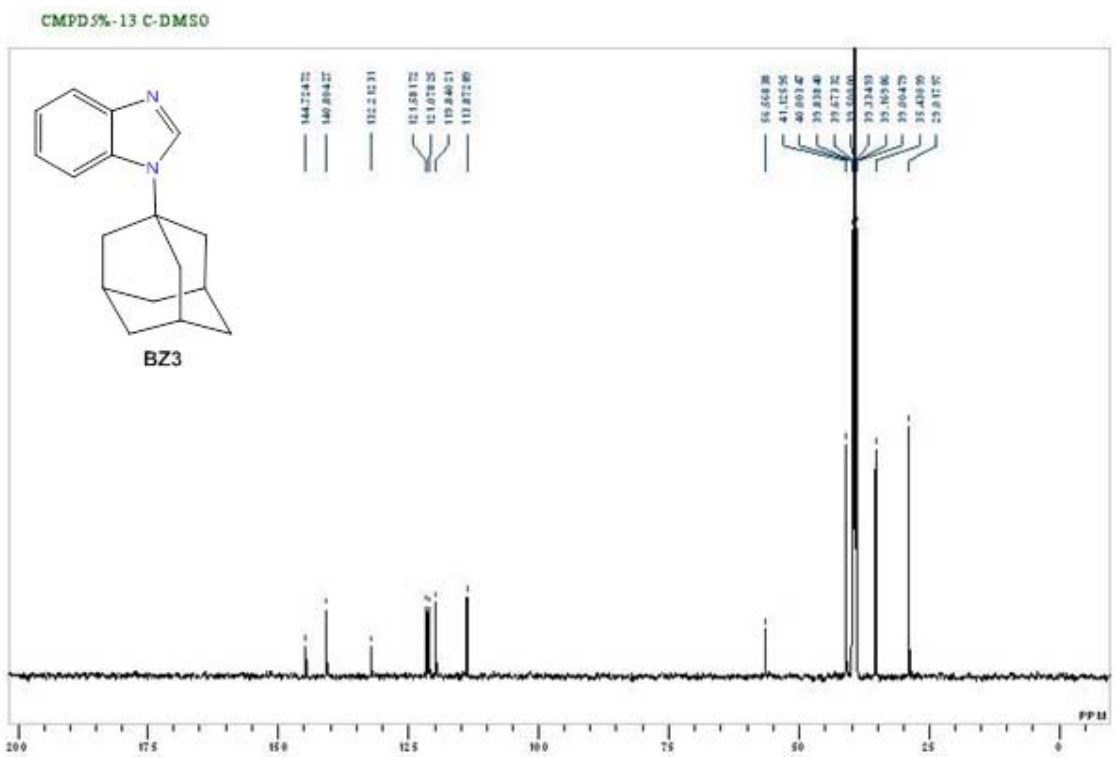

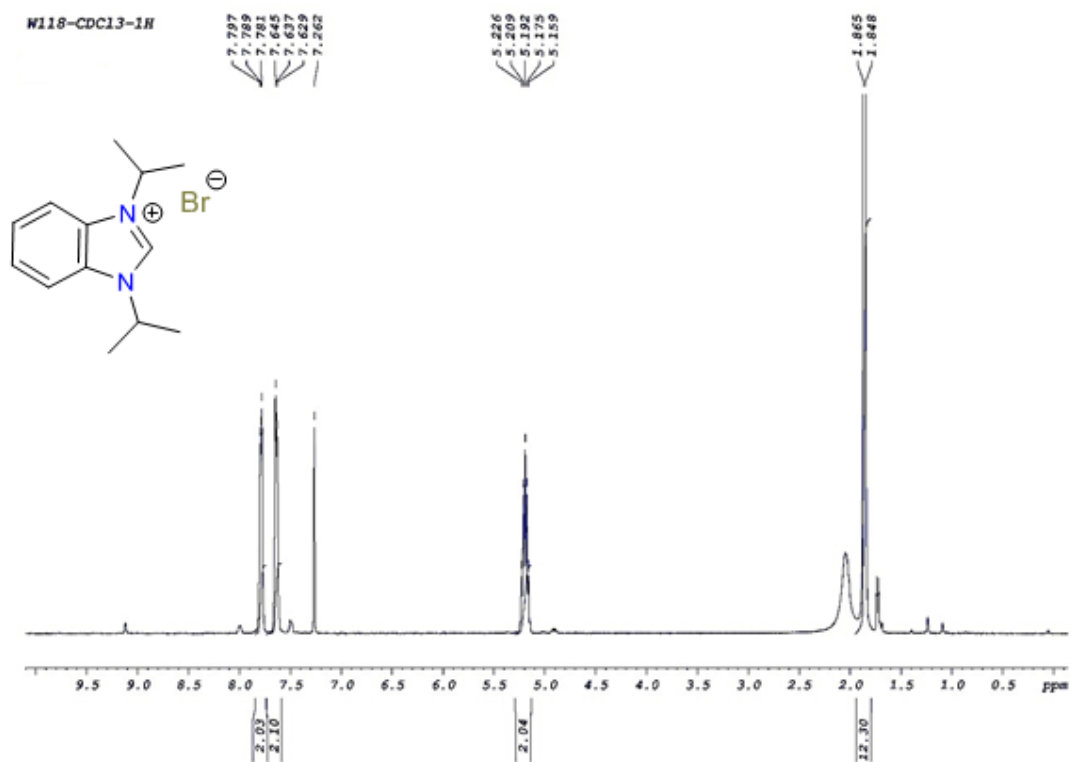

Figure S50. <sup>1</sup>H NMR spectrum for NHC1

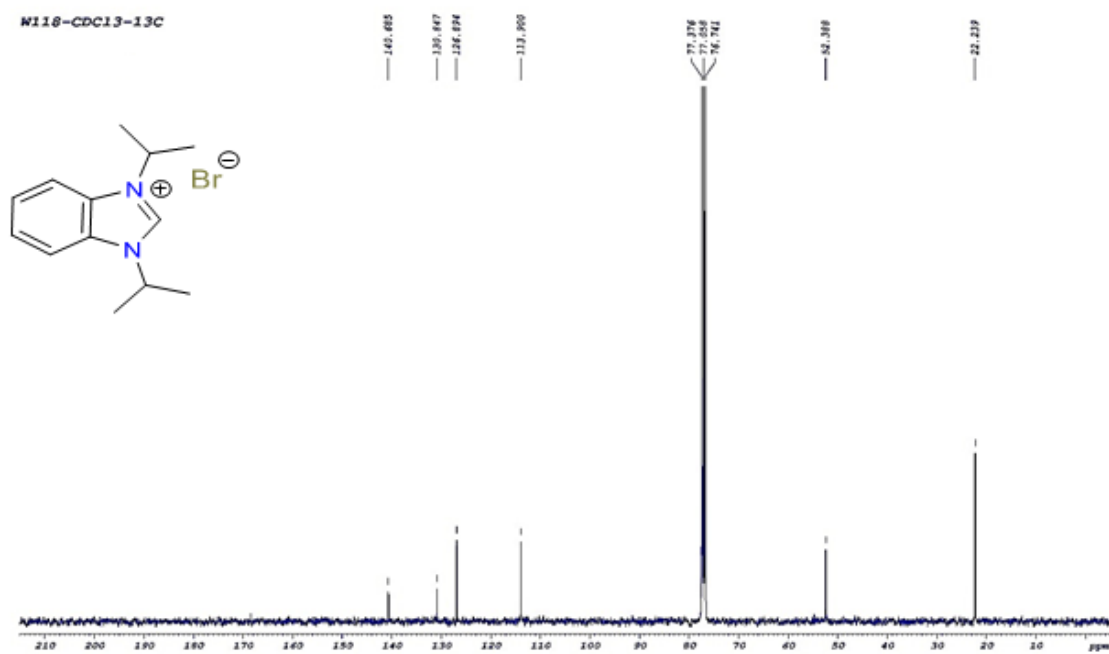

Figure S51. <sup>13</sup>C NMR spectrum for NHC1

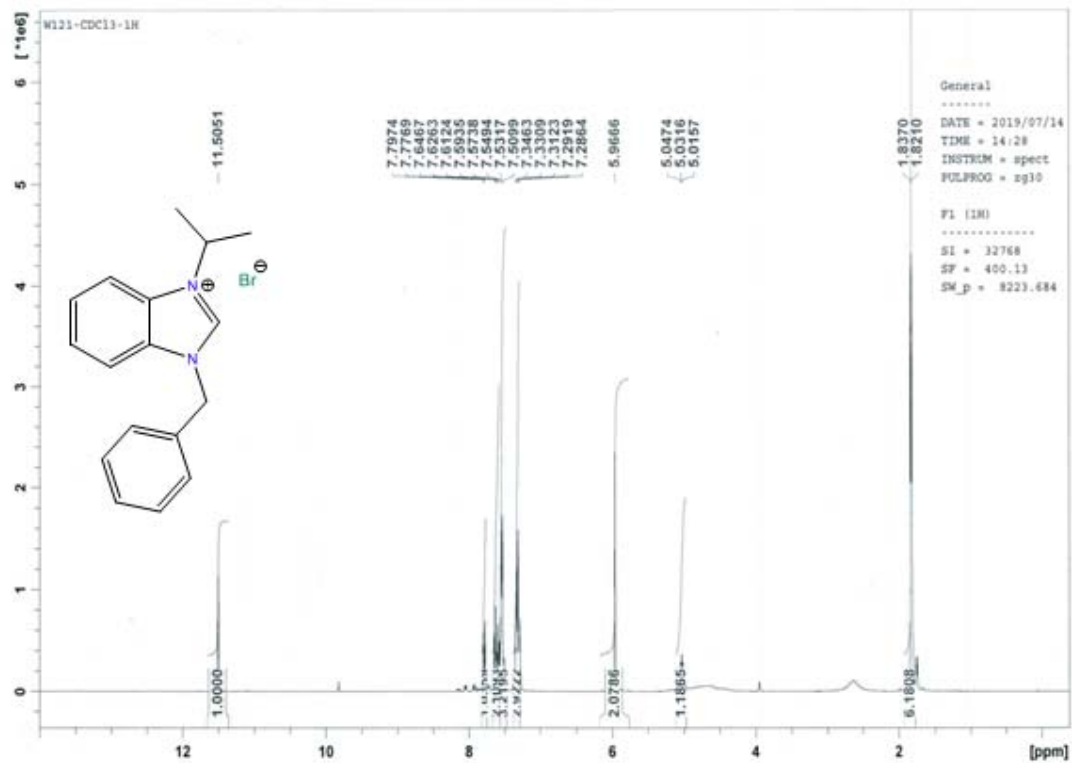

Figure S52. <sup>1</sup>H NMR spectrum for NHC2

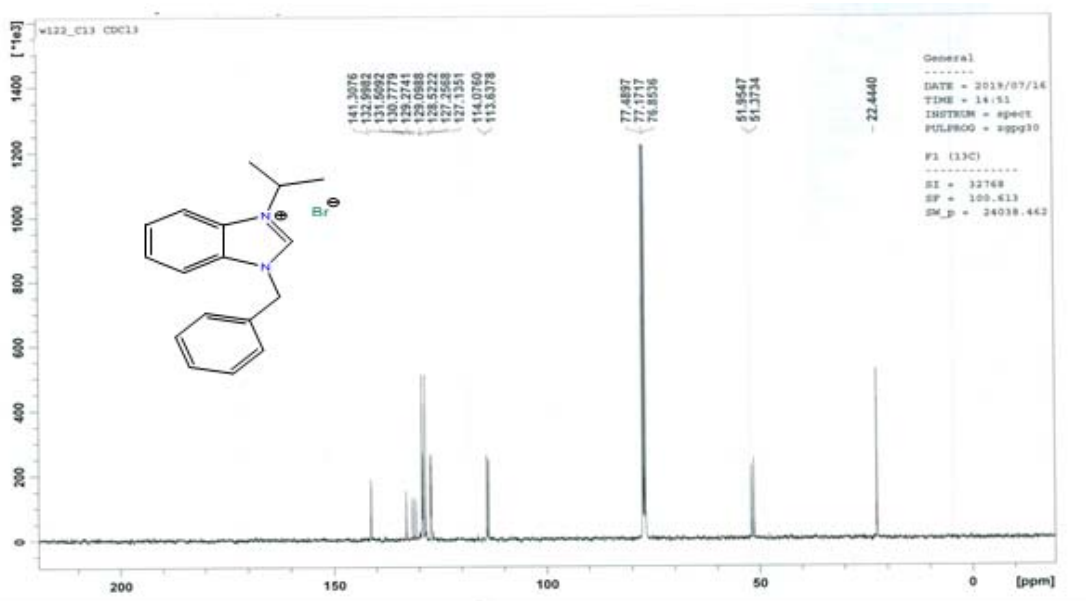

Figure S53. <sup>13</sup>C NMR spectrum for NHC2

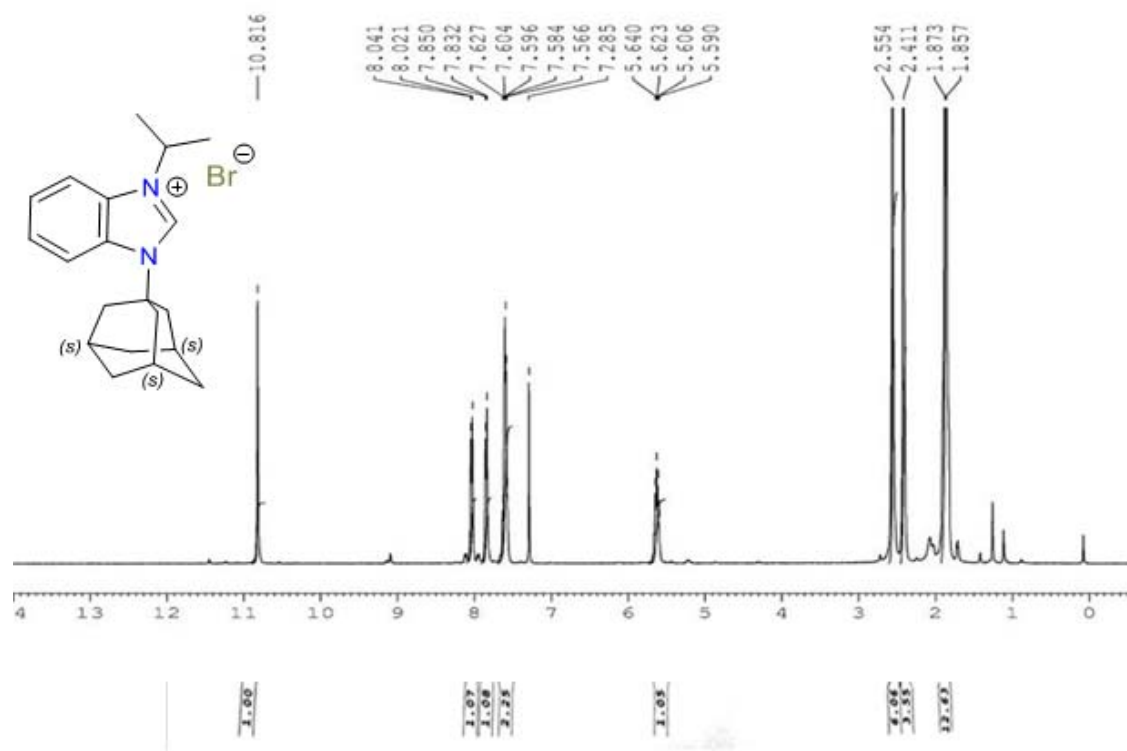

Figure S54. <sup>1</sup>H NMR spectrum for NHC3

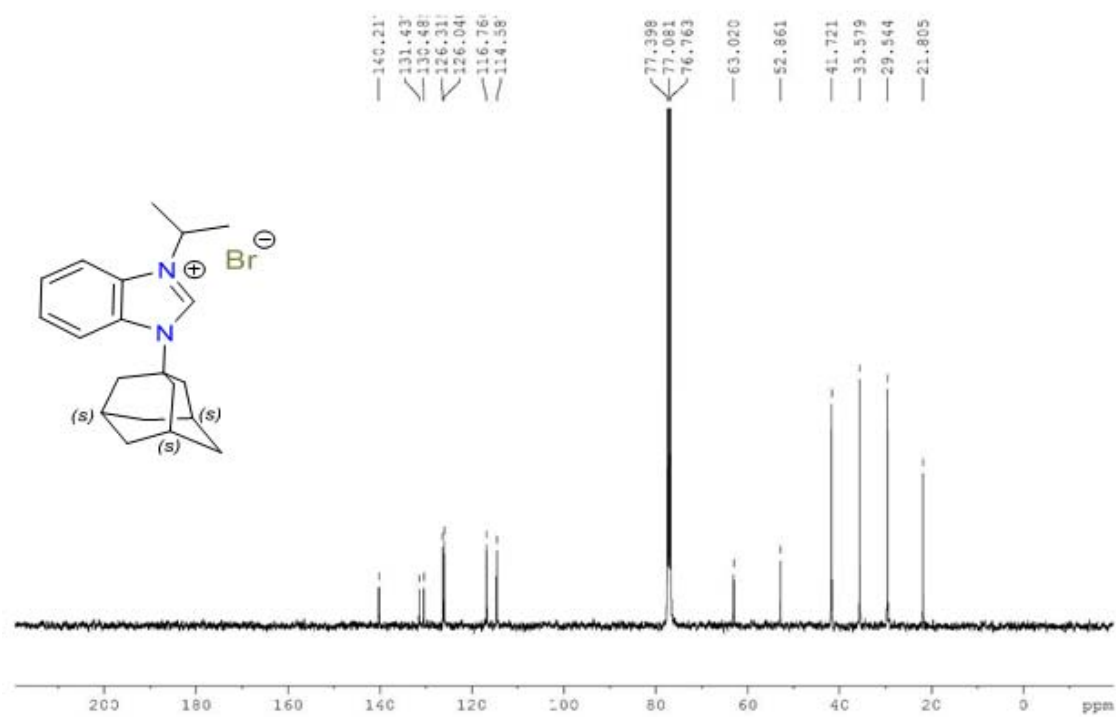

Figure S55. <sup>13</sup>C NMR spectrum for NHC3

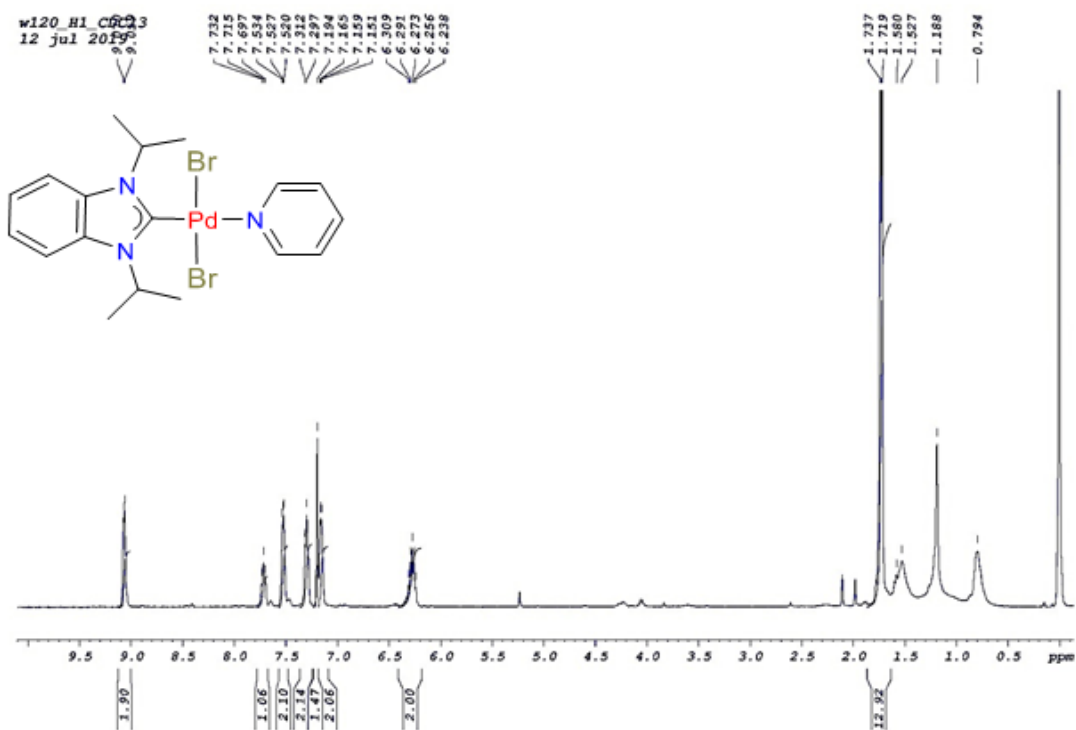

Figure S56.  $^1\text{H}$  NMR spectrum for Pd-C1

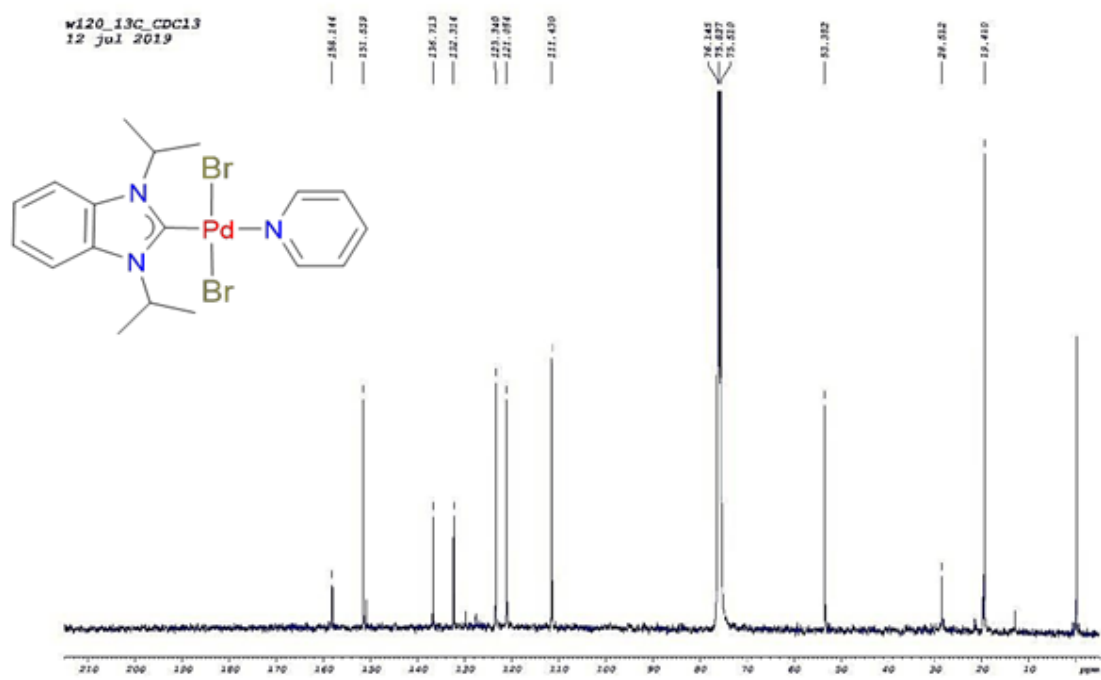

Figure S57.  $^{13}\text{C}$  NMR spectrum for Pd-C1

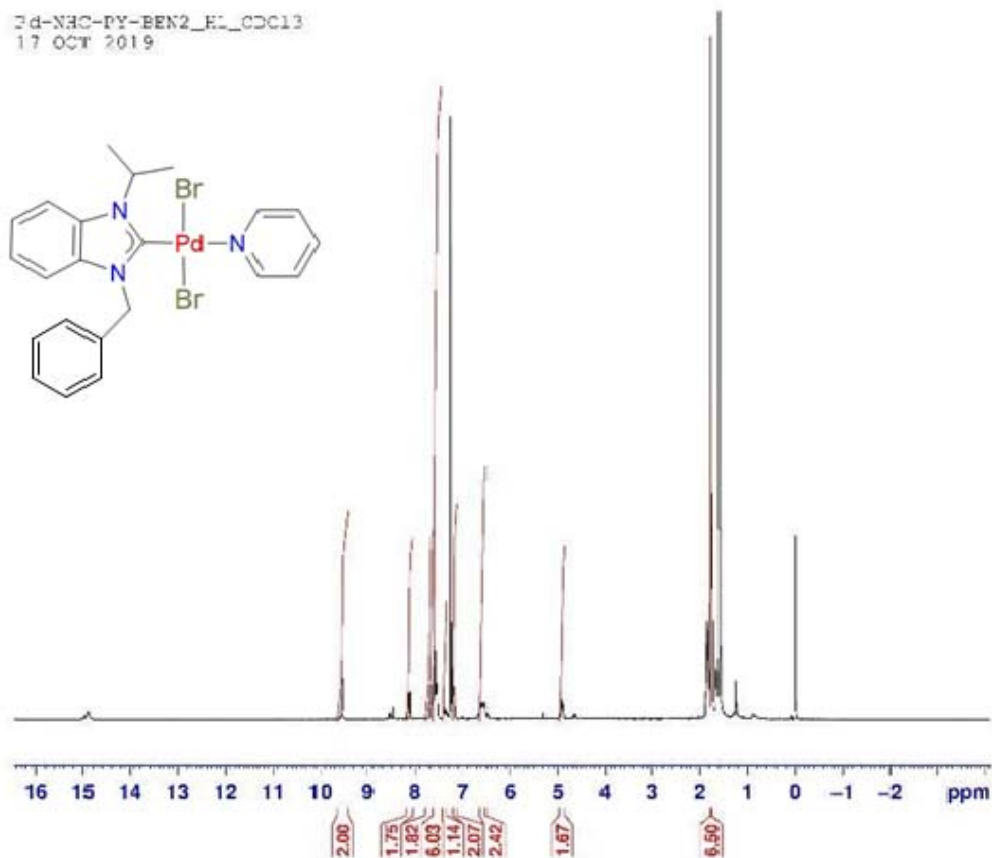

Figure S58. <sup>1</sup>H NMR spectrum for Pd-C2

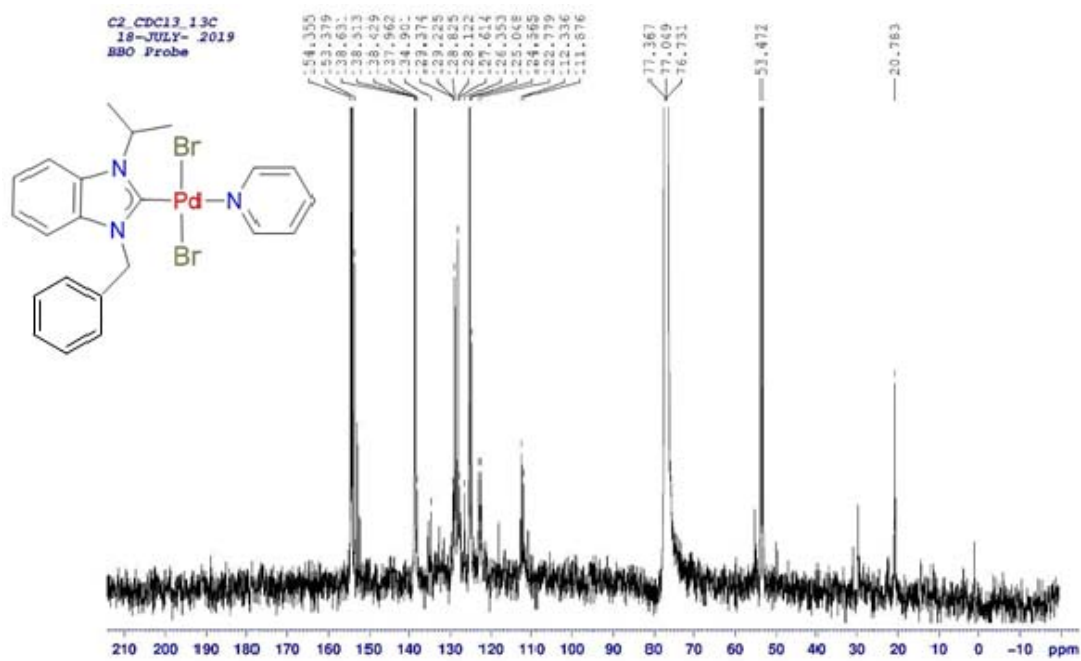

Figure S59. <sup>13</sup>C NMR spectrum for Pd-C2



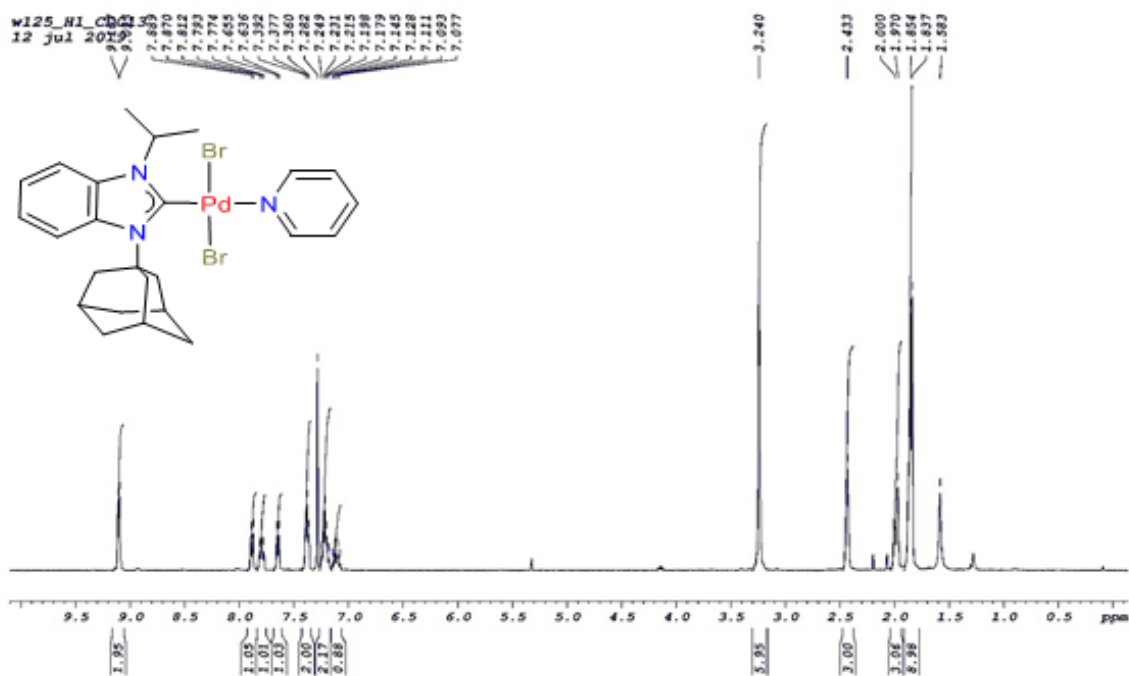

Figure 60.  $^1\text{H}$  NMR spectrum of Pd-C3

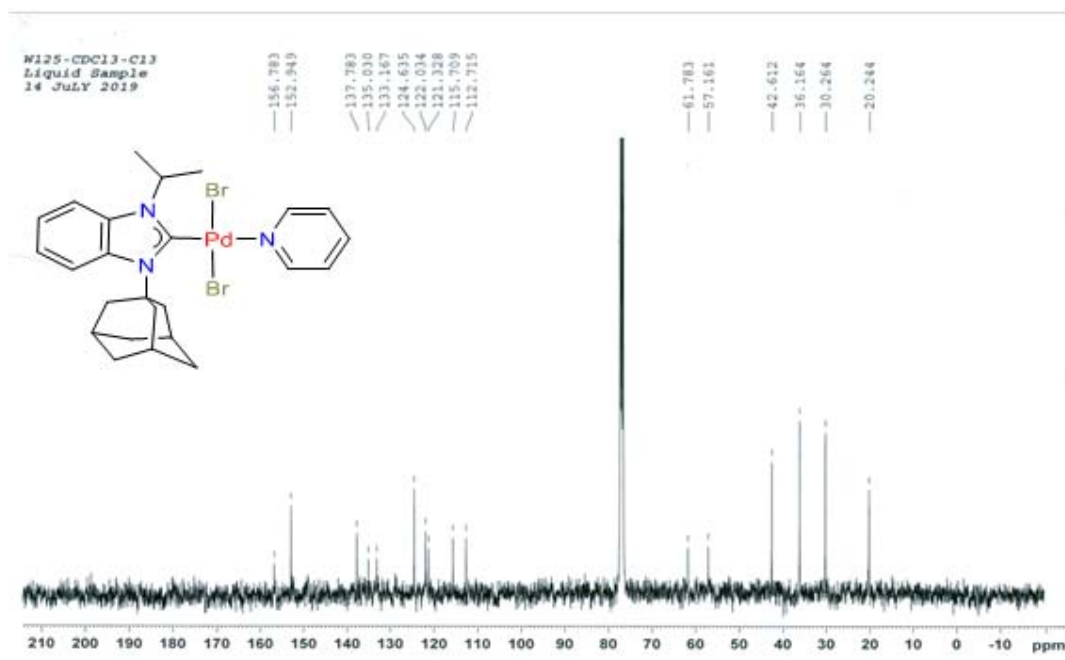

Figure 61.  $^{13}\text{C}$  NMR spectrum of Pd-C3
